# Supplementary material for: Distinct dual-isotopic signatures of major methane sources in South Asia
Source: Copernicus journal article supplement (doi:10.5194/egusphere-2026-411), 2026-02-20
Supplement: Supplementary file 1 [file datas1_south_asia.xlsx]

## Sheet: Information
Title: Distinct dual-isotopic signatures of major methane sources in South Asia
Author:
Peng Yao1, Katja Belec1, Henry Holmstrand1, Josh Balacky1, Abdus Salam2, Krishnakant Budhavant3,4, Mohanan Remani Manoj1, Khaled Shaifullah Joy2,5, Md. Alamin Hossain2, Atinderpal Singh6, Anil Patel7,8,9, Neeraj Rastogi7, Chinmay Mallik10, Kirpa Ram11, Gyanesh Kumar Singh12,13, Örjan Gustafsson*1
1Department of Environmental Science (ACES) and the Bolin Centre for Climate Research, Stockholm University, Stockholm 10691, Sweden
2Department of Chemistry, University of Dhaka, Dhaka 1000, Bangladesh
3Maldives Climate Observatory-Hanimaadhoo (MCOH), Maldives Meteorological Services, H. Dh. Hanimaadhoo 02020, Maldives
4Divecha Centre for Climate Change, Indian Institute of Science, Bangalore 560012, India
5Department of Chemistry, Drexel University, Philadelphia, PA-19104, United States
6Department of Environmental Studies, University of Delhi, Delhi, 110007, India
7Geosciences Division, Physical Research Laboratory, Ahmedabad 380009, India
8Bagchi School of Public Health, Ahmedabad University, Ahmedabad 380009, Gujarat, India
9The Climate Institute, Ahmedabad University, Ahmedabad 380009, Gujarat, India
10Department of Atmospheric Science, Central University of Rajasthan, Ajmer 305801, India
11Department of Chemistry, Institute of Science, Banaras Hindu University, Varanasi 221005, India
12Department of Civil Engineering, Indian Institute of Technology Kanpur, Kanpur, 208016, India
13Air Quality and Aerosol Metrology (AQAM) Group, National Physical Laboratory (NPL), Teddington, London TW11 0LW, UK
Corresponding: Örjan Gustafsson (Orjan.Gustafsson@aces.su.se)
Variables in methane source samples in South Asia
Sample_ID: sample identifier
Sample_type: type of methane source sample
Location_Campaign: locations and campaigns of agricultural residue burning or cow breath sampling
Location: locations where rice paddy and wastewater samples were collected
Colleague: colleagues who participated in aquatic sampling in South Asia
Lat: latitude
Lon: longitude
Sample: burning materials and burning types (flaming or smoldering)
Distance_from_fire (cm): distance from the biomass burning source
Sample_cow: number of cows sampled
Quadrant: quadrant of rice paddies (divided into four sections)
Country: country where samples were collected
Date_sampled: date of the sampling campaign
CH4_mixing_ratio (ppm): methane concentration measured in gaseous samples
Methane_concentration_in_solution (nmol/L): methane concentration measured in aquatic samples
δ13C (‰): δ13C of methane source samples
δ2H (‰): δ2H of methane source samples

## Sheet: Biomass_burning
Sample_ID	Sample_type	Location_Campaign	Lat	Lon	Sample	Distance from fire (cm)	Date_sampled	CH4_mixing_ratio (ppm)	δ13C (‰)	δ2H (‰)
SU-ACES-491	Agri burning	Chittagong	24.2022	91.3014	Rice, Flaming	3	2021-11-30	2.54492	-48.04	-85.0719
SU-ACES-492	Agri burning	Chittagong	24.2022	91.3014	Rice, Flaming	3	2021-11-30	2.38638	-47.5941	-85.5044
SU-ACES-493	Agri burning	Chittagong	24.2022	91.3014	Rice, Flaming	3	2021-11-30	2.44411	-47.391	-86.3113
SU-ACES-494	Agri burning	Chittagong	24.2022	91.3014	Rice, Flaming	3	2021-11-30	43.0632	-29.6852	-215.501
SU-ACES-539	Agri burning	Nabingar_1	24.051	91.097	Rice, Flaming	3	2021-12-02	25.8816	-38.9018	-151.742
SU-ACES-540	Agri burning	Nabingar_1	24.051	91.097	Rice, Flaming	3	2021-12-02	24.8207	-39.5989	-153.304
SU-ACES-538	Agri burning	Nabingar_1	24.051	91.097	Rice, Smoldering	5	2021-12-02	82.1354	-26.6099	-155.312
SU-ACES-545	Agri burning	Nabingar_1	24.051	91.097	Rice, Smoldering	5	2021-12-02	28.1076	-32.5099	-157.295
SU-ACES-541	Agri burning	Nabingar_2	23.8983	91.0444	Rice, Flaming	5	2021-12-02	135.097	-32.9488	-211.131
SU-ACES-542	Agri burning	Nabingar_2	23.8983	91.0444	Rice, Flaming	5	2021-12-02	18.5145	-33.2137	-207.945
SU-ACES-543	Agri burning	Nabingar_2	23.8983	91.0444	Rice, Smouldering	8	2021-12-02	33.006	-28.6506
SU-ACES-544	Agri burning	Nabingar_2	23.8983	91.0444	Rice, Smouldering	8	2021-12-02		-30.3723
SU-ACES-561	Agri burning	Madhapur	24.1447	91.3211	Rice, Smoldering & Flaming	15	2021-11-29	2.46193	-47.9329	-88.0629
SU-ACES-562	Agri burning	Madhapur	24.1447	91.3211	Rice, Smoldering & Flaming	15	2021-11-29	2.23866	-47.2521	-87.1224
SU-ACES-563	Agri burning	Madhapur	24.1447	91.3211	Rice, Smoldering & Flaming	15	2021-11-29	2.51477	-48.3971	-93.5668
SU-ACES-564	Agri burning	Madhapur	24.1447	91.3211	Rice, Smoldering & Flaming	15	2021-11-29	3.10585	-47.7449	-92.6988
SU-ACES-565	Blank				Sampling Blank			2.6442	-47.9141	-91.3084

## Sheet: Ruminants
Sample_ID	Sample_type	Location_Campaign	Lat	Lon	Sample_cow	Date_sampled	CH4_mixing_ratio (ppm)	δ13C (‰)	δ2H (‰)
SU-ACES-512	Ruminants	Shamim and brothers farm	24.3408	91.5308	2	2021-11-30	167.179	-68.7355	-334.33
SU-ACES-513	Ruminants	Shamim and brothers farm	24.3408	91.5308	2	2021-11-30	472.902	-68.6807	-340.696
SU-ACES-514	Ruminants	Shamim and brothers farm	24.3408	91.5308	1	2021-11-30	6.02596	-47.4191
SU-ACES-515	Ruminants	Shamim and brothers farm	24.3408	91.5308	1	2021-11-30	3.50897	-46.2336
SU-ACES-501	Ruminants	Asma dairy farm	24.3408	91.5308	1	2021-11-30	9.18168	-48.5038
SU-ACES-504	Ruminants	Asma dairy farm	24.3408	91.5308	1	2021-11-30	3.77231	-47.8062
SU-ACES-503	Ruminants	Asma dairy farm	24.3408	91.5308	Background	2021-11-30	8.37745	-55.0487	-226.326
SU-ACES-509	Ruminants	Asma dairy farm	24.3408	91.5308	Background	2021-11-30	2.9076	-47.8986
SU-ACES-507	Ruminants	Asma dairy farm	24.3408	91.5308	2	2021-11-30	3.89167	-45.6598
SU-ACES-510	Ruminants	Asma dairy farm	24.3408	91.5308	2	2021-11-30	10.8192	-69.3838	-288.196
SU-ACES-502	Ruminants	Principles Farm	24.3408	91.5308	1	2021-11-30	606.717	-68.0957	-344.093
SU-ACES-511	Ruminants	Principles Farm	24.3408	91.5308	1	2021-11-30	32.589	-68.589	-324.884
SU-ACES-505	Ruminants	Principles Farm	24.3408	91.5308	2	2021-11-30	4.62294	-49.1106
SU-ACES-506	Ruminants	Principles Farm	24.3408	91.5308	2	2021-11-30	241.803	-70.7153	-321.702
SU-ACES-508	Blank		24.3408	91.5308			3.94225	-51.4272
SU-ACES-481	Ruminants	Dhaka_2	23.782	90.338	1	2021-12-03	3.60297	-48.0395
SU-ACES-482	Ruminants	Dhaka_2	23.782	90.338	1	2021-12-03	2.67568	-47.7069
SU-ACES-487	Ruminants	Dhaka_2	23.782	90.338	2	2021-12-03	2.73258	-47.5746
SU-ACES-484	Ruminants	Dhaka_2	23.782	90.338	2	2021-12-03	6.12017	-47.3885
SU-ACES-488	Ruminants	Dhaka_2	23.782	90.338	Background	2021-12-03	8.97577	-61.6038	-260.482
SU-ACES-489	Ruminants	Dhaka_2	23.782	90.338	Background	2021-12-03	4.97478
SU-ACES-490	Ruminants	Dhaka	23.782	90.338	Background	2021-12-03	35.3521	-66.1379	-324.071
SU-ACES-531	Ruminants	Dhaka	23.774	90.347	2	2021-12-03	27.5603	-67.0627	-321.023
SU-ACES-532	Ruminants	Dhaka	23.774	90.347	2	2021-12-03	5.84298	-48.0121
SU-ACES-535	Ruminants	Dhaka	23.774	90.347	1	2021-12-03	2.79051	-47.7047
SU-ACES-534	Ruminants	Dhaka	23.774	90.347	1	2021-12-03	3.26266	-47.5598
SU-ACES-533	Ruminants	Dhaka	23.774	90.347	Background	2021-12-03	3.30661	-47.0317
SU-ACES-483	Blank		23.774	90.347			2.8545	-46.9472
SU-ACES-485	Blank		23.774	90.347			2.98981	-47.9666
SU-ACES-486	Blank		23.774	90.347			3.78537	-41.774
SU-ACES-571	Ruminants	Unicorm Agro	23.8575	90.6681	1	2021-11-29	6.86457	-47.6932
SU-ACES-572	Ruminants	Unicorm Agro	23.8575	90.6681	1	2021-11-29	6.70483	-47.1214
SU-ACES-573	Ruminants	Unicorm Agro	23.8575	90.6681	Background	2021-11-29	6.354	-47.5453
SU-ACES-574	Ruminants	Unicorm Agro	23.8575	90.6681	Background	2021-11-29	3.06525	-48.0219
SU-ACES-575	Ruminants	Unicorm Agro	23.8575	90.6681	2	2021-11-29	6.93977	-47.1776
SU-ACES-567	Ruminants	Unicorm Agro	23.8575	90.6681	2	2021-11-29	6.23286	-47.4055
SU-ACES-495	Blank		23.8575	90.6681			8.27297	-47.6264
SU-ACES-568	Blank		23.8575	90.6681			3.24233		-92.8454
SU-ACES-569	Blank		23.8575	90.6681			6.99391	-42.1397
SU-ACES-570	Blank		23.8575	90.6681			3.92214

## Sheet: Rice_paddies
Sample_ID	Colleague	Location	Quadrant	Lat	Lon	Country	Methane_concentration_in_solution (nmol/L)	δ13C (‰)	δ2H (‰)
Bhola_255_210903	Salam	Bhola	1	22.2259	90.7567	Bangladesh	910.466
Bhola_219_210903	Salam	Bhola	1	22.2259	90.7567	Bangladesh	988.187	-36.5067	-196.74
Bhola_217_210903	Salam	Bhola	1	22.2259	90.7567	Bangladesh	1054.04
Bhola_257_210903	Salam	Bhola	2	22.2259	90.7567	Bangladesh	1098.84
Bhola_223_210903	Salam	Bhola	2	22.2259	90.7567	Bangladesh	1216.54	-37.6977	-221.528
Bhola_206_210903	Salam	Bhola	2	22.2259	90.7567	Bangladesh	1237.91
Bhola_256_210903	Salam	Bhola	3	22.2259	90.7567	Bangladesh	524.48
Bhola_240_210903	Salam	Bhola	3	22.2259	90.7567	Bangladesh	517.114	-30.6007	-147.774
Bhola_229_210903	Salam	Bhola	3	22.2259	90.7567	Bangladesh	568.517
Bhola_278_210903	Salam	Bhola	4	22.2259	90.7567	Bangladesh	436.359
Bhola_231_210903	Salam	Bhola	4	22.2259	90.7567	Bangladesh	411.511	-30.1601	-133.365
Bhola_234_210903	Salam	Bhola	4	22.2259	90.7567	Bangladesh	418.665
Chattagram_220_210827	Salam	Chattagram	1	22.5988	91.6482	Bangladesh	1225.91	-44.1704	-309.985
Chattagram_241_210827	Salam	Chattagram	1	22.5988	91.6482	Bangladesh	1395.28
Chattagram_268_210827	Salam	Chattagram	1	22.5988	91.6482	Bangladesh	737.482
Chattagram_271_210827	Salam	Chattagram	2	22.5988	91.6482	Bangladesh	974.644
Chattagram_261_210827	Salam	Chattagram	2	22.5988	91.6482	Bangladesh	1019.68	-40.6731	-303.592
Chattagram_246_210827	Salam	Chattagram	2	22.5988	91.6482	Bangladesh	1041.46
Chattagram_221_210827	Salam	Chattagram	3	22.5988	91.6482	Bangladesh	1120.57
Chattagram_242_210827	Salam	Chattagram	3	22.5988	91.6482	Bangladesh	933.887	-41.2288	-268.467
Chattagram_252_210827	Salam	Chattagram	3	22.5988	91.6482	Bangladesh	993.014
Chattagram_213_210827	Salam	Chattagram	4	22.5988	91.6482	Bangladesh	1123.42
Chattagram_214_210827	Salam	Chattagram	4	22.5988	91.6482	Bangladesh	1163.11
Chattagram_230_210827	Salam	Chattagram	4	22.5988	91.6482	Bangladesh	1034.38	-42.2318	-274.216
Dhaka_260_210813	Salam	Dhaka	1	23.798	90.1472	Bangladesh	1740.43	-38.032	-174.064
Dhaka_248_210813	Salam	Dhaka	1	23.798	90.1472	Bangladesh	1780.3
Dhaka_218_210813	Salam	Dhaka	1	23.798	90.1472	Bangladesh	1788.8
Dhaka_236_210813	Salam	Dhaka	2	23.798	90.1472	Bangladesh	1851.35
Dhaka_265_210813	Salam	Dhaka	2	23.798	90.1472	Bangladesh	1909.64	-45.0594	-220.374
Dhaka_272_210813	Salam	Dhaka	2	23.798	90.1472	Bangladesh	1710.77
Dhaka_247_210813	Salam	Dhaka	3	23.798	90.1472	Bangladesh	1435.96
Dhaka_264_210813	Salam	Dhaka	3	23.798	90.1472	Bangladesh	1450.63
Dhaka_222_210813	Salam	Dhaka	3	23.798	90.1472	Bangladesh	1845.77	-38.4301	-173.325
Dhaka_212_210813	Salam	Dhaka	4	23.798	90.1472	Bangladesh	1935.48	-39.7019	-181.459
Dhaka_216_210813	Salam	Dhaka	4	23.798	90.1472	Bangladesh	1901.33
Dhaka_243_210813	Salam	Dhaka	4	23.798	90.1472	Bangladesh	1926.33
Netrokona_274_210815	Salam	Netrokona	1	24.6782	90.7585	Bangladesh	665.466	-27.2613	-34.7924
Netrokona_228_210815	Salam	Netrokona	1	24.6782	90.7585	Bangladesh	645.747
Netrokona_276_210815	Salam	Netrokona	1	24.6782	90.7585	Bangladesh	905.158
Netrokona_245_210815	Salam	Netrokona	2	24.6782	90.7585	Bangladesh	934.984	-33.9438	-78.4515
Netrokona_232_210815	Salam	Netrokona	2	24.6782	90.7585	Bangladesh	1093.87
Netrokona_277_210815	Salam	Netrokona	2	24.6782	90.7585	Bangladesh	1126.6
Netrokona_280_210815	Salam	Netrokona	3	24.6782	90.7585	Bangladesh
Netrokona_235_210815	Salam	Netrokona	3	24.6782	90.7585	Bangladesh	1276.26	-38.0108	-153.158
Netrokona_279_210815	Salam	Netrokona	3	24.6782	90.7585	Bangladesh	978.544
Netrokona_225_210815	Salam	Netrokona	4	24.6782	90.7585	Bangladesh	1093.34
Netrokona_249_210815	Salam	Netrokona	4	24.6782	90.7585	Bangladesh	1190.28	-34.0165	-142.101
Netrokona_269_210815	Salam	Netrokona	4	24.6782	90.7585	Bangladesh	974.226
Rajashahi_224_210819	Salam	Rajashahi	1	24.3752	88.529	Bangladesh	445.235
Rajashahi_244_210819	Salam	Rajashahi	1	24.3752	88.529	Bangladesh	495.79
Rajashahi_237_210819	Salam	Rajashahi	1	24.3752	88.529	Bangladesh	453.521	-35.4261	-218.478
Rajashahi_267_210819	Salam	Rajashahi	2	24.3752	88.529	Bangladesh	690.637	-28.8246	-209.976
Rajashahi_266_210819	Salam	Rajashahi	2	24.3752	88.529	Bangladesh	711.627
Rajashahi_262_210819	Salam	Rajashahi	2	24.3752	88.529	Bangladesh	744.673
Rajashahi_209_210819	Salam	Rajashahi	3	24.3752	88.529	Bangladesh	505.627
Rajashahi_227_210819	Salam	Rajashahi	3	24.3752	88.529	Bangladesh	1119.44	-29.8096	-216.688
Rajashahi_253_210819	Salam	Rajashahi	3	24.3752	88.529	Bangladesh	380.577
Rajashahi_263_210819	Salam	Rajashahi	4	24.3752	88.529	Bangladesh	449.149
Rajashahi_226_210819	Salam	Rajashahi	4	24.3752	88.529	Bangladesh	861.231	-33.6318	-211.678
Rajashahi_275_210819	Salam	Rajashahi	4	24.3752	88.529	Bangladesh	1557.68
BHUfarms_305_21-9-8	Kirpa	Varanasi	1	25.2558	82.9927	India	2840.36	-29.4047	-203.131
BHUfarms_343_21-9-9	Kirpa	Varanasi	1	25.2558	82.9927	India	1519.29
BHUfarms_323_21-9-8	Kirpa	Varanasi	1	25.2558	82.9927	India	2818.36	-28.5663	-185.917
BHUfarms_395_21-9-8	Kirpa	Varanasi	2	25.2558	82.9927	India	1724.39
BHUfarms_336_21-9-8	Kirpa	Varanasi	2	25.2558	82.9927	India	1026.5	-49.0185	-230.138
BHUfarms_344_21-9-8	Kirpa	Varanasi	3	25.2558	82.9927	India	1612.18
BHUfarms_334_21-9-8	Kirpa	Varanasi	3	25.2558	82.9927	India	1087.51	-42.8263	-207.392
BHUfarms_312_21-9-9	Kirpa	Varanasi	3	25.2558	82.9927	India	1520.72
BHUfarms_315_21-9-8	Kirpa	Varanasi	4	25.2558	82.9927	India	1689.65
BHUfarms_332_21-9-8	Kirpa	Varanasi	4	25.2558	82.9927	India	2004.65	-33.0002	-183.02
Satkhira_259_210909	Salam	Satkhira	1	22.6489	89.09	Bangladesh	866.708
Satkhira_168_210909	Salam	Satkhira	1	22.6489	89.09	Bangladesh	2299.77	-25.95	-97.4903
Satkhira_126_210909	Salam	Satkhira	1	22.6489	89.09	Bangladesh	2097.68	-20.9841	-64.2173
Satkhira_137_210909	Salam	Satkhira	2	22.6489	89.09	Bangladesh	2209.21	-25.4446	-100.271
Satkhira_253_210909	Salam	Satkhira	2	22.6489	89.09	Bangladesh	2225.98	-23.7176	-84.4918
Satkhira_130_210909	Salam	Satkhira	2	22.6489	89.09	Bangladesh	1015.55
Satkhira_208_210909	Salam	Satkhira	3	22.6489	89.09	Bangladesh	2203.81	-25.0678	-109.086
Satkhira_239_210909	Salam	Satkhira	3	22.6489	89.09	Bangladesh	787.766
Satkhira_295_210909	Salam	Satkhira	3	22.6489	89.09	Bangladesh	1497.51	-22.4002	-75.335
Satkhira_273_210909	Salam	Satkhira	4	22.6489	89.09	Bangladesh	598.397
Satkhira_281_210909	Salam	Satkhira	4	22.6489	89.09	Bangladesh	1675.37	-41.091	-228.677
Satkhira_254_210909	Salam	Satkhira	4	22.6489	89.09	Bangladesh	874.251
Sylhet_172_210911	Salam	Sylhet	1	24.8029	91.7951	Bangladesh	3219.2	-41.3465	-214.276
Sylhet_184_210911	Salam	Sylhet	1	24.8029	91.7951	Bangladesh	3174.19	-41.7758	-214.24
Sylhet_169_210911	Salam	Sylhet	1	24.8029	91.7951	Bangladesh	2764.39	-41.162	-214.392
Sylhet_171_210911	Salam	Sylhet	2	24.8029	91.7951	Bangladesh	2870.12	-44.0037	-242.796
Sylhet_176_210911	Salam	Sylhet	2	24.8029	91.7951	Bangladesh	2853.05	-45.7602	-241.887
Sylhet_177_210911	Salam	Sylhet	2	24.8029	91.7951	Bangladesh	2856.93	-44.1819	-241.947
Sylhet_185_210911	Salam	Sylhet	3	24.8029	91.7951	Bangladesh	4341.78	-45.1772	-230.188
Sylhet_173_210911	Salam	Sylhet	3	24.8029	91.7951	Bangladesh	4508.8	-47.5461	-243.308
Sylhet_191_210911	Salam	Sylhet	3	24.8029	91.7951	Bangladesh	4248.99	-45.1975	-234.615
Sylhet_203_210911	Salam	Sylhet	4	24.8029	91.7951	Bangladesh	3023.02	-39.3801	-191.519
Sylhet_190_210911	Salam	Sylhet	4	24.8029	91.7951	Bangladesh	3086.71	-40.6141	-201.065
Sylhet_183_210911	Salam	Sylhet	4	24.8029	91.7951	Bangladesh	3006.15	-40.5555	-194.449
Trivandrum_Chantavila_544_210923	Manoj	Chantavila	1	8.586	76.887	India	2055.59	-40.5089	-226.083
Trivandrum_Chantavila_547_210923	Manoj	Chantavila	1	8.586	76.887	India	3589.98	-41.9969	-236.807
Trivandrum_Chantavila_555_210923	Manoj	Chantavila	2	8.586	76.887	India	2163.99	-39.4797	-196.479
Trivandrum_Chantavila_542_210923	Manoj	Chantavila	2	8.586	76.887	India	2447.97	-31.7144	-156.026
Trivandrum_Chantavila_543_210923	Manoj	Chantavila	2	8.586	76.887	India	4077.09	-41.8194	-196.378
Trivandrum_Chantavila_521_210923	Manoj	Chantavila	3	8.586	76.887	India	3043.56	-50.8753	-292.347
Trivandrum_Chantavila_546_210923	Manoj	Chantavila	3	8.586	76.887	India	5256.18	-52.2302	-290.602
Trivandrum_Chantavila_552_210923	Manoj	Chantavila	4	8.586	76.887	India	1417.21
Trivandrum_Chantavila_554_210923	Manoj	Chantavila	4	8.586	76.887	India	915.822
KNP_513_08	Gyanesh	Kanpur	1	26.4892	80.185	India	20.1356
KNP_454_08	Gyanesh	Kanpur	3	26.4892	80.185	India	26.66
KNP_557_08	Gyanesh	Kanpur	4	26.4892	80.185	India	1104.17
KANPUR_501_07	Gyanesh	Kanpur	1	26.5211	80.2114	India
KANPUR_558_07	Gyanesh	Kanpur	2	26.5211	80.2114	India
KANPUR_504_07	Gyanesh	Kanpur	2	26.5211	80.2114	India	11.5211
KANPUR_556_07	Gyanesh	Kanpur	3	26.5211	80.2114	India	17.947
Kol_166	Chinmay	Kolkata	1	22.3653	88.365	India	1179.15
Kol_003	Chinmay	Kolkata	1	22.3653	88.365	India	1095.26
Kol_017	Chinmay	Kolkata	1	22.3653	88.365	India	943.281	-48.9874	-264.639
Kol_140	Chinmay	Kolkata	2	22.3653	88.365	India	1238.85
Kol_036	Chinmay	Kolkata	2	22.3653	88.365	India	1034.06	-46.8738	-249.847
Kol_167	Chinmay	Kolkata	2	22.3653	88.365	India	1253.92	-47.7186	-255.364
Alappuzha_Neelampoor_524_211005	Manoj	Neelampoor	1	9.499	76.504	India	856.18	-44.5105	-226.352
Alappuzha_Neelampoor_534_211005	Manoj	Neelampoor	1	9.499	76.504	India	32888.9	-52.889	-307.813
Alappuzha_Neelampoor_548_211005	Manoj	Neelampoor	2	9.499	76.504	India	2359.32	-44.6892	-229.477
Alappuzha_Neelampoor_549_211005	Manoj	Neelampoor	2	9.499	76.504	India	2867.73	-46.8037	-249.606
Alappuzha_Neelampoor_531_211005	Manoj	Neelampoor	3	9.499	76.504	India	8547.85	-54.6997	-317.33
Alappuzha_Neelampoor_527_211005	Manoj	Neelampoor	3	9.499	76.504	India	3294.07	-50.0576	-274.065
Alappuzha_Neelampoor_536_211005	Manoj	Neelampoor	4	9.499	76.504	India
Alappuzha_Neelampoor_526_211005	Manoj	Neelampoor	4	9.499	76.504	India	6150.09	-53.7238	-274.771
Alappuzha_Neelampoor_533_211005	Manoj	Neelampoor	1	9.499	76.504	India	37414.9	-54.0259	-312.593
Alappuzha_Neelampoor_550_211005	Manoj	Neelampoor	2	9.499	76.504	India	7521.06	-49.1135	-284.037
Alappuzha_Neelampoor_540_211005	Manoj	Neelampoor	3	9.499	76.504	India	3883.69	-51.9032	-282.599
Alappuzha_Neelampoor_528_211005	Manoj	Neelampoor	4	9.499	76.504	India
Giramatha_402_210902	Anil Patel and Neeraj	Giramatha	1	22.8786	72.5549	India
Giramatha_403_210902	Anil Patel and Neeraj	Giramatha	1	22.8786	72.5549	India	11.3279
Giramatha_404_210902	Anil Patel and Neeraj	Giramatha	1	22.8786	72.5549	India	69.9117
Giramatha_411_210902	Anil Patel and Neeraj	Giramatha	2	22.8786	72.5549	India	138.65	-43.0461	-239.334
Giramatha_412_210902	Anil Patel and Neeraj	Giramatha	2	22.8786	72.5549	India	126.519
Giramatha_414_210902	Anil Patel and Neeraj	Giramatha	2	22.8786	72.5549	India	157.616	-42.8143	-239.64
Giramatha_415_210902	Anil Patel and Neeraj	Giramatha	3	22.8786	72.5549	India	77.9378	-36.6028	-216.182
Giramatha_420_210902	Anil Patel and Neeraj	Giramatha	3	22.8786	72.5549	India	54.9642
Giramatha_421_210902	Anil Patel and Neeraj	Giramatha	3	22.8786	72.5549	India	55.0191
Giramatha_423_210902	Anil Patel and Neeraj	Giramatha	4	22.8786	72.5549	India	44.6845	-44.468	-262.178
Giramatha_428_210902	Anil Patel and Neeraj	Giramatha	4	22.8786	72.5549	India	34.5141
Giramatha_430_210902	Anil Patel and Neeraj	Giramatha	4	22.8786	72.5549	India	34.8094
BBSR_032	Chinmay	Bhubneswar	1	20.1589	85.5128	India	2227.48	-37.3104	-266.039
BBSR_009	Chinmay	Bhubneswar	1	20.1589	85.5128	India	1667.22
BBSR_151	Chinmay	Bhubneswar	1	20.1589	85.5128	India	2460.38	-38.1902	-265.654
BBSR_164	Chinmay	Bhubneswar	2	20.1589	85.5128	India	1158.16
BBSR_004	Chinmay	Bhubneswar	2	20.1589	85.5128	India	1134.14	-32.1549	-194.665
BBSR_134	Chinmay	Bhubneswar	2	20.1589	85.5128	India	1131.95
BBSR_147	Chinmay	Bhubneswar	3	20.1589	85.5128	India	1729.24
BBSR_163	Chinmay	Bhubneswar	3	20.1589	85.5128	India	851.619	-35.1273	-220.001
BBSR_008	Chinmay	Bhubneswar	3	20.1589	85.5128	India	976.635
BBSR_161	Chinmay	Bhubneswar	4	20.1589	85.5128	India	1104.01	-33.4518	-206.281
BBSR_154	Chinmay	Bhubneswar	4	20.1589	85.5128	India	1249.76
BBSR_156	Chinmay	Bhubneswar	4	20.1589	85.5128	India	1315.05
Kol2_002	Chinmay	Kolkata	1	22.3128	88.3483	India	829.171	-30.8223	-205.571
Kol2_146	Chinmay	Kolkata	1	22.3128	88.3483	India	1401.57
Kol2_210	Chinmay	Kolkata	1	22.3128	88.3483	India	898.889
Kol2_001	Chinmay	Kolkata	2	22.3128	88.3483	India	627.679
Kol2_136	Chinmay	Kolkata	2	22.3128	88.3483	India	675.145	-31.7569	-203.158
Kol2_165	Chinmay	Kolkata	2	22.3128	88.3483	India	765.64
Kol2_157	Chinmay	Kolkata	3	22.3128	88.3483	India	1253.19
Kol2_155	Chinmay	Kolkata	3	22.3128	88.3483	India
Kol2_162	Chinmay	Kolkata	3	22.3128	88.3483	India	1672.77	-33.4172	-171.294
Kol2_141	Chinmay	Kolkata	4	22.3128	88.3483	India	533.733
Kol2_160	Chinmay	Kolkata	4	22.3128	88.3483	India	895.654
Kol2_159	Chinmay	Kolkata	4	22.3128	88.3483	India	580.429	-35.6208	-216.028
Bareja_431_210902	Anil Patel and Neeraj	Bareja	1	22.8478	72.5849	India	367.295
Bareja_448_210902	Anil Patel and Neeraj	Bareja	1	22.8478	72.5849	India	460.569	-48.8354	-247.296
Bareja_449_210902	Anil Patel and Neeraj	Bareja	2	22.8478	72.5849	India	226.928
Bareja_450_210902	Anil Patel and Neeraj	Bareja	2	22.8478	72.5849	India	236.124	-41.4445	-205.534
Bareja_451_210902	Anil Patel and Neeraj	Bareja	3	22.8478	72.5849	India	257.086
Bareja_458_210902	Anil Patel and Neeraj	Bareja	3	22.8478	72.5849	India	350.411	-48.9276	-257.324
Bareja_460_210902	Anil Patel and Neeraj	Bareja	4	22.8478	72.5849	India	1033.9	-49.9553	-237.445
Bareja_468_210902	Anil Patel and Neeraj	Bareja	4	22.8478	72.5849	India	367.254
Dalla_455_210829	Atinder	Dalla, Ludhiana, Punjab	1	30.7367	75.4234	India	55.9871
Dalla_456_210829	Atinder	Dalla, Ludhiana, Punjab	1	30.7367	75.4234	India	96.5821	-52.1372	-272.729
Dalla_466_210829	Atinder	Dalla, Ludhiana, Punjab	1	30.7367	75.4234	India
Dalla_479_210829	Atinder	Dalla, Ludhiana, Punjab	2	30.7367	75.4234	India
Dalla_476_210829	Atinder	Dalla, Ludhiana, Punjab	2	30.7367	75.4234	India	41.3358	-46.9553	-252.961
Dalla_502_210829	Atinder	Dalla, Ludhiana, Punjab	2	30.7367	75.4234	India
Dalla_457_210829	Atinder	Dalla, Ludhiana, Punjab	3	30.7367	75.4234	India	150.921
Dalla_477_210829	Atinder	Dalla, Ludhiana, Punjab	3	30.7367	75.4234	India	194.841	-44.6154	-238.627
Dalla_507_210829	Atinder	Dalla, Ludhiana, Punjab	3	30.7367	75.4234	India	200.019	-44.8075	-243.914
Dalla_503_210829	Atinder	Dalla, Ludhiana, Punjab	4	30.7367	75.4234	India	66.9832
Dalla_465_210829	Atinder	Dalla, Ludhiana, Punjab	4	30.7367	75.4234	India	76.7229
Dalla_478_210829	Atinder	Dalla, Ludhiana, Punjab	4	30.7367	75.4234	India	75.9862	-47.4499	-258.525
Narmana_400_210831	Atinder	Narmana, Patiala, Punjab	1	30.3183	76.2042	India	69.4281
Narmana_434_210831	Atinder	Narmana, Patiala, Punjab	1	30.3183	76.2042	India	60.6456
Narmana_425_210831	Atinder	Narmana, Patiala, Punjab	1	30.3183	76.2042	India	71.7289	-49.3883	-216.159
Narmana_447_210831	Atinder	Narmana, Patiala, Punjab	2	30.3183	76.2042	India	28.0987
Narmana_417_210831	Atinder	Narmana, Patiala, Punjab	2	30.3183	76.2042	India	35.7755
Narmana_401_210831	Atinder	Narmana, Patiala, Punjab	2	30.3183	76.2042	India	30.3212
Narmana_427_210831	Atinder	Narmana, Patiala, Punjab	3	30.3183	76.2042	India	114.12
Narmana_446_210831	Atinder	Narmana, Patiala, Punjab	3	30.3183	76.2042	India	115.34
Narmana_398_210831	Atinder	Narmana, Patiala, Punjab	3	30.3183	76.2042	India	114.874	-42.8313	-165.758
Narmana_407_210831	Atinder	Narmana, Patiala, Punjab	4	30.3183	76.2042	India
Narmana_399_210831	Atinder	Narmana, Patiala, Punjab	4	30.3183	76.2042	India	854.161	-45.8904	-229.528
Narmana_418_210831	Atinder	Narmana, Patiala, Punjab	4	30.3183	76.2042	India	893.314	-45.218	-232.042

## Sheet: Wastewater
Sample_ID	Colleague	Location	Country	Lat	Lon	Methane_concentration_in_solution (nmol/L)	δ13C (‰)	δ2H (‰)
Buriganga_041_210826	Salam	Buriganga	Bangladesh	23.7111	90.3946	107069	-46.5039	-353.926
Buriganga_024_210826	Salam	Buriganga	Bangladesh	23.7111	90.3946	109306	-47.5046	-355.908
Buriganga_041_210826	Salam	Buriganga	Bangladesh	23.7111	90.3946	107069	-46.5039	-353.926
Karnaphuli2_022_210827	Salam	Karnaphuli	Bangladesh	22.3219	91.8682	976.173	-43.9784	-249.435
Karnaphuli2_026_210827	Salam	Karnaphuli	Bangladesh	22.3219	91.8682	1061.44	-43.9646	-241.106
Karnaphuli2_053_210827	Salam	Karnaphuli	Bangladesh	22.3219	91.8682	989.575
Karnaphuli1_050_210827	Salam	Karnaphuli	Bangladesh	22.313	91.8711	284.528
Karnaphuli1_020_210827	Salam	Karnaphuli	Bangladesh	22.313	91.8711	342.531	-37.4093	-124.185
Karnaphuli1_025_210827	Salam	Karnaphuli	Bangladesh	22.313	91.8711	273.62
Narayanganj_044_210820	Salam	Narayanganj	Bangladesh	23.6962	90.5241	6084.49	-39.5229	-251.098
Narayanganj_047_210820	Salam	Narayanganj	Bangladesh	23.6962	90.5241	4211.65
Narayanganj_052_210820	Salam	Narayanganj	Bangladesh	23.6962	90.5241	951.548
Surma_015_210912	Salam	Surma	Bangladesh	24.8882	91.8561	30196	-49.6245	-353.022
Surma_027_210912	Salam	Surma	Bangladesh	24.8882	91.8561	108140	-46.0676	-354.29
Surma_028_210912	Salam	Surma	Bangladesh	24.8882	91.8561	112069	-47.5156	-354.785
Trivandrum_532_211008	Manoj	Aniyoor	India	8.487	76.946	36028.4
Trivandrum_538_211008	Manoj	Aniyoor	India	8.487	76.946	35905.6	-52.4727	-333.163
Trivandrum_537_211008	Manoj	Aniyoor	India	8.57	76.907	1203.04
Trivandrum_530_211008	Manoj	Aniyoor	India	8.57	76.907	1122.03
Trivandrum_541_211008	Manoj	Aniyoor	India	8.487	76.946	35435.8	-50.4686	-334.858
KNP_618_23	Gyanesh	Gwaltoli	India	26.4881	80.3308
KNP_619_23	Gyanesh	Parmat	India	26.4847	80.3406	87675	-48.778	-362.571
Delhi_509_211012	Atinder	Hudson Lane, Delhi	India	28.6927	77.2062	1847.63
Delhi_505_211012	Atinder	Hudson Lane, Delhi	India	28.6927	77.2062	1923.74
Delhi_054_211012	Atinder	Hudson Lane, Delhi	India	28.6927	77.2062	1813.57		24.8828
Kharzoori_506_211013	Atinder	Khazoori Khas, Delhi	India	28.7104	77.2612	22374.7	-46.1361	-368.622
Kharzoori_040_211013	Atinder	Khazoori Khas, Delhi	India	28.7104	77.2612		-45.7642	-356.34
Kharzoori_084_211013	Atinder	Khazoori Khas, Delhi	India	28.7104	77.2612	21261.9	-45.6532	-364.192
Palsana_069_210902	Anil Patel and Neeraj	Palsana	India	23.2167	72.5049
Palsana_082_210902	Anil Patel and Neeraj	Palsana	India	23.2167	72.5049	82957.9	-44.1077	-347.835
Palsana_075_210902	Anil Patel and Neeraj	Palsana	India	23.2167	72.5049	79638.9	-44.3996	-350.483
Pirana_097_210906	Anil Patel and Neeraj	Pirana	India	22.9809	72.5432	24368.1	-43.8436	-331.479
Pirana_098_210906	Anil Patel and Neeraj	Pirana	India	22.9809	72.5432	22175.2	-45.4837	-329.382
Assi_65_21-10-9	Kirpa	Varanasi	India	25.2829	83.0095	18055.9	-44.8685	-353.154
Assi_68_21-10-9	Kirpa	Varanasi	India	25.2829	83.0095	18345.4	-45.8942	-352.502
Assi_72_21-10-9	Kirpa	Varanasi	India	25.2829	83.0095	18467.1	-46.5653	-356.32
Assi_71_21-10-9	Kirpa	Varanasi	India	25.2829	83.0095	16382.3	-46.8673	-353.403
Assi_89_21-10-9	Kirpa	Varanasi	India	25.2829	83.0095	18272.4	-46.6527	-355.04
Vasana_087_210906	Anil Patel and Neeraj	Vasana	India	22.9817	72.5255	70062.6	-43.2308	-335.873
Vasana_095_210906	Anil Patel and Neeraj	Vasana	India	22.9817	72.5255	70173.6	-42.8001	-337.529
