# Supplementary material for: Distinct dual-isotopic signatures of major methane sources in South Asia
Source: Copernicus journal article supplement (doi:10.5194/egusphere-2026-411), 2026-02-20
Supplement: Supplementary file 1 [file Supporting Information 20251001.pdf › Supporting Information 20251001.pdf]

## Supporting Information

### Distinct dual-isotopic signatures of major methane sources in South Asia

Peng Yao<sup>1</sup>, Katja Belec<sup>1</sup>, Henry Holmstrand<sup>1</sup>, Josh Balackey<sup>1</sup>, Abdus Salam<sup>2</sup>, Krishnakant Budhavant<sup>3,4</sup>, Mohanan Remani Manoj<sup>1</sup>, Khaled Shaifullah Joy<sup>2,5</sup>, Md. Alamin Hossain<sup>2</sup>, Atinderpal Singh<sup>6</sup>, Anil Patel<sup>7,8,9</sup>, Neeraj Rastogi<sup>7</sup>, Chinmay Mallik<sup>10</sup>, Kirpa Ram<sup>11</sup>, Gyanesh Kumar Singh<sup>12,13</sup>, Örjan Gustafsson\*<sup>1</sup>

<sup>1</sup>Department of Environmental Science (ACES) and the Bolin Centre for Climate Research, Stockholm University, Stockholm 10691, Sweden

<sup>2</sup>Department of Chemistry, University of Dhaka, Dhaka 1000, Bangladesh

<sup>3</sup>Maldives Climate Observatory-Hanimaadhoo (MCOH), Maldives Meteorological Services, H. Dh. Hanimaadhoo 02020, Maldives

<sup>4</sup>Divecha Centre for Climate Change, Indian Institute of Science, Bangalore 560012, India

<sup>5</sup>Department of Chemistry, Drexel University, Philadelphia, PA-19104, United States

<sup>6</sup>Department of Environmental Studies, University of Delhi, Delhi, 110007, India

<sup>7</sup>Geosciences Division, Physical Research Laboratory, Ahmedabad 380009, India

<sup>8</sup>Bagchi School of Public Health, Ahmedabad University, Ahmedabad 380009, Gujarat, India

<sup>9</sup>The Climate Institute, Ahmedabad University, Ahmedabad 380009, Gujarat, India

<sup>10</sup>Department of Atmospheric Science, Central University of Rajasthan, Ajmer 305801, India

<sup>11</sup>Department of Chemistry, Institute of Science, Banaras Hindu University, Varanasi 221005, India

<sup>12</sup>Department of Civil Engineering, Indian Institute of Technology Kanpur, Kanpur, 208016, India

<sup>13</sup>Air Quality and Aerosol Metrology (AQAM) Group, National Physical Laboratory (NPL), Teddington, London TW11 0LW, UK

Corresponding: Örjan Gustafsson ([Orjan.Gustafsson@aces.su.se](mailto:Orjan.Gustafsson@aces.su.se))

|    |                          |
|----|--------------------------|
| 26 | <b>Table of contents</b> |
| 27 | Sections S1              |
| 28 | Figs. S1–S4              |
| 29 | Data S1–S2               |
| 30 |                          |

31    **S1. Isotopic source analysis of CH<sub>4</sub> from major sources in South Asia**

32    Isotopic source analysis of CH<sub>4</sub> from major sources in South Asia performed using the Keeling  
33    graphical approach based on the data obtained on source-specific samples collected in South Asia.  
34    Specific data available in Data S1.

35

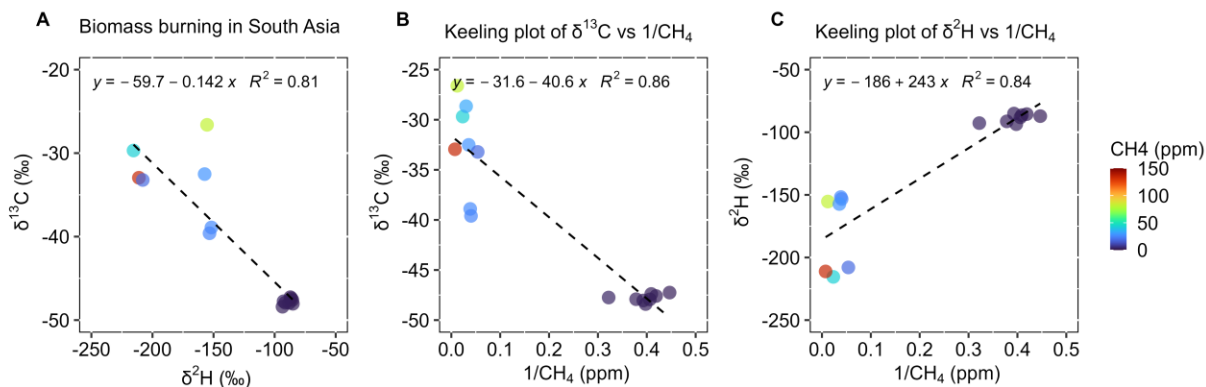

**Fig. S1. Mixing ratios and isotopic characteristics of CH<sub>4</sub> from biomass burning in South Asia.** (A) Synchronous variations in  $\delta^{13}\text{C}$  and  $\delta^2\text{H}$  of CH<sub>4</sub>. (B) Keeling plot for  $\delta^{13}\text{C}$ . (C) Keeling plot for  $\delta^2\text{H}$ .

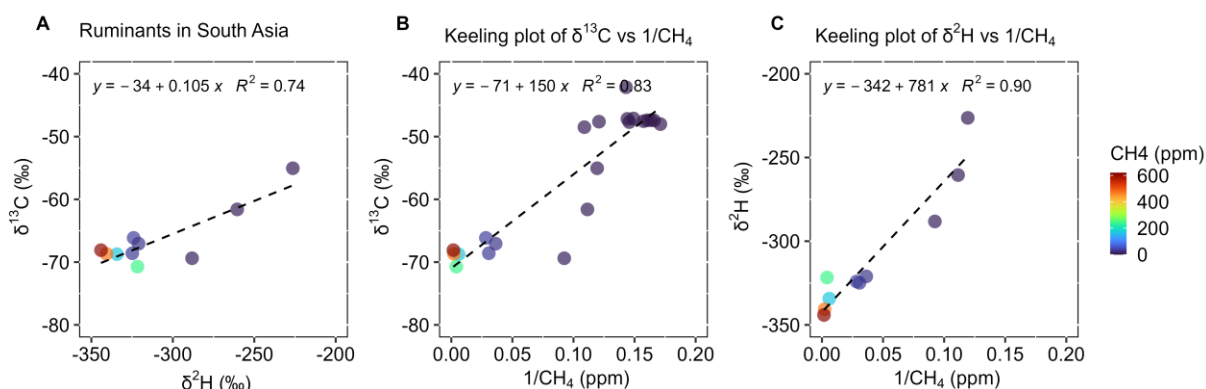

**Fig. S2. Mixing ratios and isotopic characteristics of CH<sub>4</sub> from ruminants in South Asia.** (A) Synchronous variations in  $\delta^{13}\text{C}$  and  $\delta^2\text{H}$  of CH<sub>4</sub>. (B) Keeling plot for  $\delta^{13}\text{C}$ . (C) Keeling plot for  $\delta^2\text{H}$ .

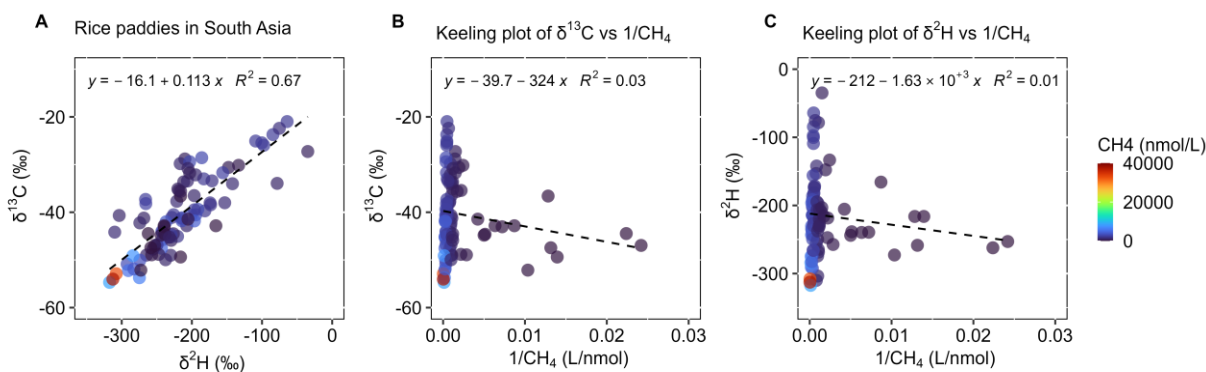

**Fig. S3. Mixing ratios and isotopic characteristics of CH<sub>4</sub> from rice paddies in South Asia.**

(A) Synchronous variations in  $\delta^{13}\text{C}$  and  $\delta^2\text{H}$  of CH<sub>4</sub>. (B) Keeling plot for  $\delta^{13}\text{C}$ . (C) Keeling plot for  $\delta^2\text{H}$ .

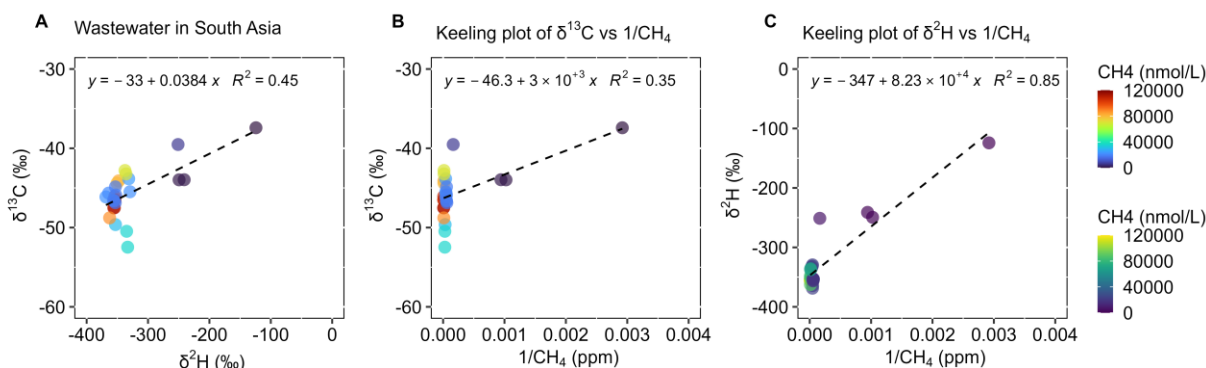

**Fig. S4. Mixing ratios and isotopic characteristics of CH<sub>4</sub> from wastewater in South Asia. (A)**

Synchronous variations in  $\delta^{13}\text{C}$  and  $\delta^2\text{H}$  of CH<sub>4</sub>. (B) Keeling plot for  $\delta^{13}\text{C}$ . (C) Keeling plot for  $\delta^2\text{H}$ .
