# Supplementary material for: Distinct dual-isotopic signatures of major methane sources in South Asia
Source: Copernicus journal article supplement (doi:10.5194/egusphere-2026-411), 2026-02-20
Supplement: Supplementary file 2 [file datas2_global.xlsx]

## Sheet: Information
Title: Distinct dual-isotopic signatures of major methane sources in South Asia
Author:
Peng Yao1, Katja Belec1, Henry Holmstrand1, Josh Balacky1, Abdus Salam2, Krishnakant Budhavant3,4, Mohanan Remani Manoj1, Khaled Shaifullah Joy2,5, Md. Alamin Hossain2, Atinderpal Singh6, Anil Patel7,8,9, Neeraj Rastogi7, Chinmay Mallik10, Kirpa Ram11, Gyanesh Kumar Singh12,13, Örjan Gustafsson*1
1Department of Environmental Science (ACES) and the Bolin Centre for Climate Research, Stockholm University, Stockholm 10691, Sweden
2Department of Chemistry, University of Dhaka, Dhaka 1000, Bangladesh
3Maldives Climate Observatory-Hanimaadhoo (MCOH), Maldives Meteorological Services, H. Dh. Hanimaadhoo 02020, Maldives
4Divecha Centre for Climate Change, Indian Institute of Science, Bangalore 560012, India
5Department of Chemistry, Drexel University, Philadelphia, PA-19104, United States
6Department of Environmental Studies, University of Delhi, Delhi, 110007, India
7Geosciences Division, Physical Research Laboratory, Ahmedabad 380009, India
8Bagchi School of Public Health, Ahmedabad University, Ahmedabad 380009, Gujarat, India
9The Climate Institute, Ahmedabad University, Ahmedabad 380009, Gujarat, India
10Department of Atmospheric Science, Central University of Rajasthan, Ajmer 305801, India
11Department of Chemistry, Institute of Science, Banaras Hindu University, Varanasi 221005, India
12Department of Civil Engineering, Indian Institute of Technology Kanpur, Kanpur, 208016, India
13Air Quality and Aerosol Metrology (AQAM) Group, National Physical Laboratory (NPL), Teddington, London TW11 0LW, UK
Corresponding: Örjan Gustafsson (Orjan.Gustafsson@aces.su.se)
Variables in methane source samples compiled from the literature
Published_date: year when the reference was published
Reference: authors of the reference
Region: region where methane source samples were collected
Biomass_type: type of biomass burned (C3 or C4)
Fire_type: combustion conditions (flaming or smoldering; field or laboratory; grass or forest)
Diet: feed type (C3 or C4)
Diet_ratio_C3:C4: C3:C4 ratio, if provided
Type: detailed type of methane source sample
δ13C_range (‰): δ13C values reported as ranges in the paper
δ13C (‰): δ13C value reported as a single number in the paper
SD_δ13C: standard deviation of δ13C values reported in the paper
n_δ13C: number of δ13C samples measured in the paper
δ13C_final (‰): final δ13C value used in this study, combining ranges and single values
δ2H_range (‰): δ2H values reported as ranges in the paper
δ2H (‰): δ2H value reported as a single number in the paper
SD_δ2H: standard deviation of δ2H values reported in the paper
n_δ2H: number of δ2H samples measured in the paper
δ2H_final (‰): final δ2H value used in this study, combining ranges and single values
Latitude: latitude of wetland and rice paddy methane samples
Waste_type: type of waste source (landfill, wastewater, or others)
Article: type of publication (paper or other sources)
Keeling_plot: whether a Keeling plot was applied in the study (yes/no)
Isotopic_fractionation_Δ13Ca (‰): isotopic fractionation in δ13C from raw materials to methane produced by combustion
Isotopic_fractionation_Δ2Ha (‰): isotopic fractionation in δ2H from raw materials to methane produced by combustion
Keeling_plot_Δ13Cb (‰): deviation between the Keeling plot–derived δ13C value and the measured δ13C value
Keeling_plot_Δ2Hb (‰): deviation between the Keeling plot–derived δ2H value and the measured δ2H value
Keeling_plot_δ13C (‰): δ13C value derived from a Keeling plot by the authors of this study (if only measured δ13C was reported in the paper)
Keeling_plot_SD_δ13C: standard deviation of the δ13C value derived from a Keeling plot by the authors of this study
Keeling_plot_δ2H (‰): δ2H value derived from a Keeling plot by the authors of this study (if only measured δ2H was reported in the paper)
Keeling_plot_SD_δ2H: standard deviation of the δ2H value derived from a Keeling plot by the authors of this study
Comment: additional notes or remarks
References
Al-Shalan, A., Lowry, D., Fisher, R. E., Nisbet, E. G., Zazzeri, G., Al-Sarawi, M., and France, J. L.: Methane emissions in Kuwait: Plume identification, isotopic characterisation and inventory verification, Atmos. Environ., 268, 118763, https://doi.org/10.1016/j.atmosenv.2021.118763, 2022.
Allen, D.: Attributing Atmospheric Methane to Anthropogenic Emission Sources, Acc. Chem. Res., 49, 1344–1350, https://doi.org/10.1021/acs.accounts.6b00081, 2016.
Assan, S., Baudic, A., Guemri, A., Ciais, P., Gros, V., and Vogel, F. R.: Characterization of interferences to in situ observations of δ13CH4 and C2H6 when using a cavity ring-down spectrometer at industrial sites, Atmos. Meas. Tech., 10, 2077–2091, https://doi.org/10.5194/amt-10-2077-2017, 2017.
Assan, S., Vogel, F. R., Gros, V., Baudic, A., Staufer, J., and Ciais, P.: Can we separate industrial CH4 emission sources from atmospheric observations? - A test case for carbon isotopes, PMF and enhanced APCA, Atmos. Environ., 187, 317–327, https://doi.org/10.1016/j.atmosenv.2018.05.004, 2018.
Bakkaloglu, S., Lowry, D., Fisher, R. E., Menoud, M., Lanoisellé, M., Chen, H., Röckmann, T., and Nisbet, E. G.: Stable isotopic signatures of methane from waste sources through atmospheric measurements, Atmos. Environ., 276, 119021, https://doi.org/10.1016/j.atmosenv.2022.119021, 2022.
Barker, P. A., Allen, G., Gallagher, M., Pitt, J. R., Fisher, R. E., Bannan, T., Nisbet, E. G., Bauguitte, S. J. B., Pasternak, D., Cliff, S., Schimpf, M. B., Mehra, A., Bower, K. N., Lee, J. D., Coe, H., and Percival, C. J.: Airborne measurements of fire emission factors for African biomass burning sampled during the MOYA campaign, Atmos. Chem. Phys., 20, 15443–15459, https://doi.org/10.5194/acp…
Bergamaschi, P.: Seasonal variations of stable hydrogen and carbon isotope ratios in methane from a Chinese rice paddy, J. Geophys. Res. Atmos., 102, 25383–25393, https://doi.org/10.1029/97JD01664, 1997.
Bergamaschi, P., Lubina, C., Königstedt, R., Fischer, H., Veltkamp, A. C., and Zwaagstra, O.: Stable isotopic signatures (δ13C, δD) of methane from European landfill sites, J. Geophys. Res. Atmos., 103, 8251–8265, https://doi.org/10.1029/98JD00105, 1998.
Bilek, R. S., Tyler, S. C., Kurihara, M., and Yagi, K.: Investigation of cattle methane production and emission over a 24‐hour period using measurements of δ13C and δD of emitted CH4 and rumen water, J. Geophys. Res. Atmos., 106, 15405–15413, https://doi.org/10.1029/2001JD900177, 2001.
Bock, M., Schmitt, J., Beck, J., Seth, B., Chappellaz, J., and Fischer, H.: Glacial/interglacial wetland, biomass burning, and geologic methane emissions constrained by dual stable isotopic CH4 ice core records, Proc. Natl. Acad. Sci., 114, E5778–E5786, https://doi.org/10.1073/pnas.1613883114, 2017.
Brownlow, R., Lowry, D., Fisher, R. E., France, J. L., Lanoisellé, M., White, B., Wooster, M. J., Zhang, T., and Nisbet, E. G.: Isotopic Ratios of Tropical Methane Emissions by Atmospheric Measurement, Global Biogeochem. Cycles, 31, 1408–1419, https://doi.org/10.1002/2017GB005689, 2017.
Chanton, J. and Liptay, K.: Seasonal variation in methane oxidation in a landfill cover soil as determined by an in situ stable isotope technique, Global Biogeochem. Cycles, 14, 51–60, https://doi.org/10.1029/1999GB900087, 2000.
Chanton, J. P., Whiting, G. J., Blair, N. E., Lindau, C. W., and Bollich, P. K.: Methane emission from rice: Stable isotopes, diurnal variations, and CO2 exchange, Global Biogeochem. Cycles, 11, 15–27, https://doi.org/10.1029/96GB03761, 1997.
Chanton, J. P., Rutkowski, C. M., Schwartz, C. C., Ward, D. E., and Boring, L.: Factors influencing the stable carbon isotopic signature of methane from combustion and biomass burning, J. Geophys. Res. Atmos., 105, 1867–1877, https://doi.org/10.1029/1999JD900909, 2000.
Day, S., Amico, M. D., Etheridge, D., Ong, C., Rodger, A., and Sherman, B.: Characterisation of Regional Fluxes of Methane in the Surat Basin , Queensland Detection and Flux Determination, 2015.
Fischer, H., Behrens, M., Bock, M., Richter, U., Schmitt, J., Loulergue, L., Chappellaz, J., Spahni, R., Blunier, T., Leuenberger, M., and Stocker, T. F.: Changing boreal methane sources and constant biomass burning during the last termination, Nature, 452, 864–867, https://doi.org/10.1038/nature06825, 2008.
Fisher, R. E., Sriskantharajah, S., Lowry, D., Lanoisellé, M., Fowler, C. M. R., James, R. H., Hermansen, O., Lund Myhre, C., Stohl, A., Greinert, J., Nisbet-Jones, P. B. R., Mienert, J., and Nisbet, E. G.: Arctic methane sources: Isotopic evidence for atmospheric inputs, Geophys. Res. Lett., 38, n/a-n/a, https://doi.org/10.1029/2011GL049319, 2011.
Fisher, R. E., France, J. L., Lowry, D., Lanoisellé, M., Brownlow, R., Pyle, J. A., Cain, M., Warwick, N., Skiba, U. M., Drewer, J., Dinsmore, K. J., Leeson, S. R., Bauguitte, S. J. B., Wellpott, A., O’Shea, S. J., Allen, G., Gallagher, M. W., Pitt, J., Percival, C. J., Bower, K., George, C., Hayman, G. D., Aalto, T., Lohila, A., Aurela, M., Laurila, T., Crill, P. M., McCalley, C. K., and Nisbet,…
France, J. L., Fisher, R. E., Lowry, D., Allen, G., Andrade, M. F., Bauguitte, S. J. B., Bower, K., Broderick, T. J., Daly, M. C., Forster, G., Gondwe, M., Helfter, C., Hoyt, A. M., Jones, A. E., Lanoisellé, M., Moreno, I., Nisbet-Jones, P. B. R., Oram, D., Pasternak, D., Pitt, J. R., Skiba, U., Stephens, M., Wilde, S. E., and Nisbet, E. G.: δ13C methane source signatures from tropical wetland an…
Fujita, R., Morimoto, S., Maksyutov, S., Kim, H., Arshinov, M., Brailsford, G., Aoki, S., and Nakazawa, T.: Global and Regional CH4 Emissions for 1995–2013 Derived From Atmospheric CH4 , δ13C‐CH4 , and δD‐CH4 Observations and a Chemical Transport Model, J. Geophys. Res. Atmos., 125, https://doi.org/10.1029/2020JD032903, 2020.
Happell, J. D., Chanton, J. P., Whiting, G. J., and Showers, W. J.: Stable isotopes as tracers of methane dynamics in Everglades marshes with and without active populations of methane oxidizing bacteria, J. Geophys. Res. Atmos., 98, 14771–14782, https://doi.org/10.1029/93JD00765, 1993.
Happell, J. D., Chanton, J. P., and Showers, W. S.: The influence of methane oxidation on the stable isotopic composition of methane emitted from Florida swamp forests, Geochim. Cosmochim. Acta, 58, 4377–4388, https://doi.org/10.1016/0016-7037(94)90341-7, 1994.
Hoheisel, A., Yeman, C., Dinger, F., Eckhardt, H., and Schmidt, M.: An improved method for mobile characterisation of δ13CH4 source signatures and its application in Germany, Atmos. Meas. Tech., 12, 1123–1139, https://doi.org/10.5194/amt-12-1123-2019, 2019.
Hornibrook, E. R. C., Longstaffe, F. J., and Fyfe, W. S.: Spatial distribution of microbial methane production pathways in temperate zone wetland soils: Stable carbon and hydrogen isotope evidence, Geochim. Cosmochim. Acta, 61, 745–753, https://doi.org/10.1016/S0016-7037(96)00368-7, 1997.
Klevenhusen, F., Bernasconi, S. M., Hofstetter, T. B., Bolotin, J., Kunz, C., and Soliva, C. R.: Efficiency of monolaurin in mitigating ruminal methanogenesis and modifying C-isotope fractionation when incubating diets composed of either C3 or C4 plants in a rumen simulation technique (Rusitec) system, Br. J. Nutr., 102, 1308–1317, https://doi.org/10.1017/S0007114509990262, 2009.
Klevenhusen, F., Bernasconi, S. M., Kreuzer, M., and Soliva, C. R.: Experimental validation of the Intergovernmental Panel on Climate Change default values for ruminant-derived methane and its carbon-isotope signature, Anim. Prod. Sci., 50, 159, https://doi.org/10.1071/AN09112, 2010.
Lansdown, J. ., Quay, P. ., and King, S. .: CH4 production via CO2 reduction in a temperate bog: A source of 13C-depIeted CH4, Geochim. Cosmochim. Acta, 56, 3493–3503, https://doi.org/10.1016/0016-7037(92)90393-W, 1992.
Lansdown, J. M.: The carbon and hydrogen stable isotope composition of methane released from natural wetlands and ruminants, University of Washington, 1992.
Levin, I., Bergamaschi, P., Dörr, H., and Trapp, D.: Stable isotopic signature of methane from major sources in Germany, Chemosphere, 26, 161–177, https://doi.org/10.1016/0045-6535(93)90419-6, 1993.
Lopez, M., Sherwood, O. A., Dlugokencky, E. J., Kessler, R., Giroux, L., and Worthy, D. E. J.: Isotopic signatures of anthropogenic CH4 sources in Alberta, Canada, Atmos. Environ., 164, 280–288, https://doi.org/10.1016/j.atmosenv.2017.06.021, 2017.
Lowry, D., Holmes, C. W., Rata, N. D., O’Brien, P., and Nisbet, E. G.: London methane emissions: Use of diurnal changes in concentration and δ13C to identify urban sources and verify inventories, J. Geophys. Res. Atmos., 106, 7427–7448, https://doi.org/10.1029/2000JD900601, 2001.
Lowry, D., Fisher, R. E., France, J. L., Coleman, M., Lanoisellé, M., Zazzeri, G., Nisbet, E. G., Shaw, J. T., Allen, G., Pitt, J., and Ward, R. S.: Environmental baseline monitoring for shale gas development in the UK: Identification and geochemical characterisation of local source emissions of methane to atmosphere, Sci. Total Environ., 708, 134600, https://doi.org/10.1016/j.scitotenv.2019.1346…
Lu, X., Harris, S. J., Fisher, R. E., France, J. L., Nisbet, E. G., Lowry, D., Röckmann, T., van der Veen, C., Menoud, M., Schwietzke, S., and Kelly, B. F. J.: Isotopic signatures of major methane sources in the coal seam gas fields and adjacent agricultural districts, Queensland, Australia, Atmos. Chem. Phys., 21, 10527–10555, https://doi.org/10.5194/acp-21-10527-2021, 2021.
Martens, C. S., Kelley, C. A., Chanton, J. P., and Showers, W. J.: Carbon and hydrogen isotopic characterization of methane from wetlands and lakes of the Yukon‐Kuskokwim delta, western Alaska, J. Geophys. Res. Atmos., 97, 16689–16701, https://doi.org/10.1029/91JD02885, 1992.
Melton, J. R., Schaefer, H., and Whiticar, M. J.: Enrichment in 13C of atmospheric CH4 during the Younger Dryas termination, Clim. Past, 8, 1177–1197, https://doi.org/10.5194/cp-8-1177-2012, 2012.
Menoud, M., van der Veen, C., Lowry, D., Fernandez, J. M., Bakkaloglu, S., France, J. L., Fisher, R. E., Maazallahi, H., Stanisavljević, M., Nęcki, J., Vinkovic, K., Łakomiec, P., Rinne, J., Korbeń, P., Schmidt, M., Defratyka, S., Yver-Kwok, C., Andersen, T., Chen, H., and Röckmann, T.: New contributions of measurements in Europe to the global inventory of the stable isotopic composition of metha…
Nakagawa, F., Yoshida, N., Sugimoto, A., Wada, E., Yoshioka, T., Ueda, S., Vijarnsorn, P., Wada, E., Yoshioka, T., Nakagawa, F., Sugimoto, A., Vijarnsorn, P., and Yoshida, N.: Stable Isotope and Radiocarbon Compositions of Methane Emitted from Tropical Rice Paddies and Swamps in Southern Thailand, Biogeochemistry, 61, 1–19, https://doi.org/10.1023/A:1020270032512, 2002.
Ni, Y., Dai, J., Zou, C., Liao, F., Shuai, Y., and Zhang, Y.: Geochemical characteristics of biogenic gases in China, Int. J. Coal Geol., 113, 76–87, https://doi.org/10.1016/j.coal.2012.07.003, 2013.
Nisbet, E. G., Allen, G., Fisher, R. E., France, J. L., Lee, J. D., Lowry, D., Andrade, M. F., Bannan, T. J., Barker, P., Bateson, P., Bauguitte, S. J. B., Bower, K. N., Broderick, T. J., Chibesakunda, F., Cain, M., Cozens, A. E., Daly, M. C., Ganesan, A. L., Jones, A. E., Lambakasa, M., Lunt, M. F., Mehra, A., Moreno, I., Pasternak, D., Palmer, P. I., Percival, C. J., Pitt, J. R., Riddle, A. J.,…
Rust, F.: Ruminant Methane δ(13C/12C) Values: Relation to Atmospheric Methane, Science (80-. )., 211, 1044–1046, https://doi.org/10.1126/science.7466376, 1981.
Schulze, E., Lohmeyer, S., and Giese, W.: Determination of 13C/12C-Ratios in Rumen Produced Methane and CO2 of Cows, Sheep and Camels, Isotopes Environ. Health Stud., 34, 75–79, https://doi.org/10.1080/10256019708036334, 1998.
Schwietzke, S., Sherwood, O. A., Bruhwiler, L. M. P., Miller, J. B., Etiope, G., Dlugokencky, E. J., Michel, S. E., Arling, V. A., Vaughn, B. H., White, J. W. C., and Tans, P. P.: Upward revision of global fossil fuel methane emissions based on isotope database, Nature, 538, 88–91, https://doi.org/10.1038/nature19797, 2016.
Sherwood, O. A., Schwietzke, S., Arling, V. A., and Etiope, G.: Global Inventory of Gas Geochemistry Data from Fossil Fuel, Microbial and Burning Sources, version 2017, Earth Syst. Sci. Data, 9, 639–656, https://doi.org/10.5194/essd-9-639-2017, 2017.
Snover, A. K., Quay, P. D., and Hao, W. M.: The D/H content of methane emitted from biomass burning, Global Biogeochem. Cycles, 14, 11–24, https://doi.org/10.1029/1999GB900075, 2000.
Stevens, C. M. and Engelkemeir, A.: Stable carbon isotopic composition of methane from some natural and anthropogenic sources, J. Geophys. Res. Atmos., 93, 725–733, https://doi.org/10.1029/JD093iD01p00725, 1988.
Townsend-Small, A., Marrero, J. E., Lyon, D. R., Simpson, I. J., Meinardi, S., and Blake, D. R.: Integrating Source Apportionment Tracers into a Bottom-up Inventory of Methane Emissions in the Barnett Shale Hydraulic Fracturing Region, Environ. Sci. Technol., 49, 8175–8182, https://doi.org/10.1021/acs.est.5b00057, 2015.
Townsend‐Small, A., Tyler, S. C., Pataki, D. E., Xu, X., and Christensen, L. E.: Isotopic measurements of atmospheric methane in Los Angeles, California, USA: Influence of “fugitive” fossil fuel emissions, J. Geophys. Res. Atmos., 117, 1–11, https://doi.org/10.1029/2011JD016826, 2012.
Tyler, S. C., Zimmerman, P. R., Cumberbatch, C., Greenberg, J. P., Westberg, C., and Darlington, J. P. E. C.: Measurements and interpretation of δ13C of methane from termites, rice paddies, and wetlands in Kenya, Global Biogeochem. Cycles, 2, 341–355, https://doi.org/10.1029/GB002i004p00341, 1988.
Tyler, S. C.: 13C/12C Ratios in Atmospheric Methane and Some of Its Sources, 395–409, https://doi.org/10.1007/978-1-4612-3498-2_22, 1989.
Umezawa, T., Aoki, S., Kim, Y., Morimoto, S., and Nakazawa, T.: Carbon and hydrogen stable isotopic ratios of methane emitted from wetlands and wildfires in Alaska: Aircraft observations and bonfire experiments, J. Geophys. Res., 116, D15305, https://doi.org/10.1029/2010JD015545, 2011.
Umezawa, T., Machida, T., Aoki, S., and Nakazawa, T.: Contributions of natural and anthropogenic sources to atmospheric methane variations over western Siberia estimated from its carbon and hydrogen isotopes, Global Biogeochem. Cycles, 26, 1–15, https://doi.org/10.1029/2011GB004232, 2012.
Uzaki, M., Mizutani, H., and Wada, E.: Carbon isotope composition of CH4 from rice paddies in Japan, Biogeochemistry, 13, 159–175, https://doi.org/10.1007/BF00002775, 1991.
Wahlen, M.: The Global Methane Cycle, Annu. Rev. Earth Planet. Sci., 21, 407–426, https://doi.org/10.1146/annurev.ea.21.050193.002203, 1993.
Wahlen, M., Tanaka, N., Henry, R., Yoshinari, T., Fairbanks, R. G., Shemesh, A., and Broecker, W. S.: 13C, D and 14C in methane, Eos (Washington. DC)., 68, 1220, 1987.
Wahlen, M., Tanaka, N., Henry, R., Deck, B., Zeglen, J., Vogel, J. S., Southon, J., Shemesh, A., Fairbanks, R., and Broecker, W.: Carbon-14 in Methane Sources and in Atmospheric Methane: The Contribution from Fossil Carbon, Science (80-. )., 245, 286–290, https://doi.org/10.1126/science.245.4915.286, 1989.
Walter, K. M., Chanton, J. P., Chapin, F. S., Schuur, E. A. G., and Zimov, S. A.: Methane production and bubble emissions from arctic lakes: Isotopic implications for source pathways and ages, J. Geophys. Res., 113, G00A08, https://doi.org/10.1029/2007JG000569, 2008.
Yamada, K., Ozaki, Y., Nakagawa, F., Sudo, S., Tsuruta, H., and Yoshida, N.: Hydrogen and carbon isotopic measurements of methane from agricultural combustion: Implications for isotopic signatures of global biomass burning sources, J. Geophys. Res. Atmos., 111, 1–12, https://doi.org/10.1029/2005JD006750, 2006.
Zazzeri, G., Lowry, D., Fisher, R. E., France, J. L., Lanoisellé, M., and Nisbet, E. G.: Plume mapping and isotopic characterisation of anthropogenic methane sources, Atmos. Environ., 110, 151–162, https://doi.org/10.1016/j.atmosenv.2015.03.029, 2015.

## Sheet: Biomass burning
Published_date	Reference	Region	Biomass_type	Fire_type	δ13C_range (‰)	δ13C (‰)	SD_δ13C	n_δ13C	δ2H_range (‰)	δ2H (‰)	SD_δ2H	n_δ2H	Article	Keeling_plot	Isotopic_fractionation_Δ13Ca (‰)	Isotopic_fractionation_Δ2Ha (‰)	Comment
1987	Wahlen et al.	USA	Forest	Field		-24							n	n			Conference abstract
1988	Stevens and Engelkemeir	USA	C3, brush, grass	Field burning		-28.15	4.69077	4					y	n	Range -7.9 to 1.3
1989	Wahlen et al.	USA	C3	Brush fire		-26.6	0.4	2					y	n
1993	Levin et al.	Germany	C3 wood	Stove fire		-26.4		1					y	n
2000	Chanton et al.	Ichauway, Zambia, Florida	Mainly C3, forest and grassland	Flaming, Smouldering, Mixed		-26.72	3.41277	50					y	n	Range -11.4 to 13.2
2000	Snover et al.	Brazil	C3	Lab: Pinus ponderosa needle		-28.7	3.18646	12		-233	2	12	y	n	Range -2 to -3	-124
2000	Snover et al.	Brazil	Mainly C3	Field: Forest		-28.87	1.88	3		-210	16	4	y	n	Range 0 to 4	Range -130 to -180
2000	Snover et al.	Brazil	C3, C4	Field: Pasture		-19.46	0.42	1					y	n
2006	Yamada et al.	Japan	C3 agricultural residues	Bonfire and laboratory	Range -19.9 to -35.1	-27.5	7.6		Range -196 to -262%	-229	33		y	n	Range -8.6% to 6.9	Range -101 to -174%
2006	Yamada et al.	Japan	C3, C4, Global biomass burning	Not included		-23.6				-169			y	n	2.2	-121
2011	Umezawa et al.	Alaska, USA	C3	Forest		-27.5	2	1		-285	111	1	y	y			No mean value reported
2011	Umezawa et al.	Global average	C3	Global biomass burning						-204	11		y	y
2011	Fisher et al.	Canada	C3 pine	Forest fire		-28	1	2					y	n
2016	Ginty (cited in Lu et al., 2021)	Australia	Forest: NSW	Forest: NSW		-22.2							y	y
2017	Brownlow et al.	China, Malaysia, Zimbabwe	C3	Grass, Wood, Crop residue	Range -28.5 ± 0.4 to -33.4 ± 0.6	-30.95	4.9	16					y	y			Difference Δ13Cb exist, but varied in a large range, not included
2017	Brownlow et al.	China, Malaysia, Zimbabwe	C4	Grass, Wood, Crop residue	Range -15.9 ± 1.3 to -18.8 ± 0.3	-17.35	2.9	12					y	y			Difference Δ13Cb exist, but varied in a large range, not included
2020	Barker et al.	Senegal and Uganda, Africa	Mainly C3	Field fire, regional sources		-33.7	1.05						y	y
2020	Barker et al. (summarized in Nisbet et al., 2022)	Senegal and Uganda, Africa	C3 woodlands, leaf litter etc.	Field fire, smoke plumes		-29.9	0.9						y	y
2020	Barker et al. (summarized in Nisbet et al., 2022)	Casamance, Africa	C3 woodland	Field fire, smoke plumes		-28							y	y
2022	Nisbet et al.	N. Uganda	C4 fires	Grassland	Range -12 to -16	-14	2						y	y
2022	Nisbet et al.	Central Uganda	C3 and C4 fires	Farmland fires	Range -16 to -28	-22	6						y	y
2008	Fischer et al., 2008	Global	Biomass burning			-23				-225			y	n
2012	Melton et al., 2012	Global	Biomass burning			-24.6				-225			y	n
2017	Bock et al., 2017	Global	Biomass burning			-22.35	2.35			-225	30		y	n
2017	Sherwood et al., 2017	Global	Biomass burning			-26.2	4.8			-208	15		y	n
2020	Fujita et al., 2020	Global	Biomass burning			-26.2				-211			y	n

## Sheet: Ruminants
Published_date	Reference	Region	Diet	Diet_ratio C3:C4	δ13C_range (‰)	δ13C (‰)	SD_δ13C	n_δ13C	δ13C_final (‰)	δ2H (‰)	SD_δ2H	n_δ2H	δ2H_final (‰)	Article	Keeling_plot	Keeling_plot_Δ13Cb (‰)	Keeling_plot_Δ2Hb (‰)	Keeling_plot_δ13C (‰)	Keeling_plot_SD_δ13C	Keeling_plot_δ2H (‰)	Keeling_plot_SD_δ2H	Comment
1981	Rust (cited in Stevens and Engelkemier, 1988)	USA	C3 diet			-64			-64					y	na
1981	Rust (cited in Stevens and Engelkemier, 1988)	USA	C4 diet			-49			-49					y	na
1988	Stevens and Engelkemier (summary of Rust 1981)	Global	C3 and C4 mix 2.5:1	2.5:1		-60			-60					y	na
1988	Stevens and Engelkemeir (cited in Brownlow et al., 2017)	Germany	C3 diet		Range -60 to -74	-67	7		-67					y	na
1989	Wahlen et al. 1989 and 1990	USA, West Virginia 39°N, 80°W	C3			-71.3	4.1	4	-71.3	-308	25	4	-308	y	na
1992	Lansdown et al.	USA, Washington state				-63		1	-63	-404		1	-404	n	na							Thesis
1993	Levin et al.	Germany	Cows (100% C3 diet)			-65.1	1.7	15	-65.1	-301	10	13	-301	y	na
1993	Levin et al.	Germany	Cows (60-80% C4 diet)			-55.6	1.4	3	-55.6	-295	10	4	-295	y	na
1993	Levin et al.	Germany	Sheep (C3 diet)			-70.6		1	-70.6					y	na
1993	Levin et al.	Germany	Goat (C3 diet)			-65.2		1	-65.2					y	na
1993, 2010	Levin et al. (1993), and Klevenhusen et al. (2010) (cited in Brownlow et al., 2017)	Germany	C4 diet		Range -50 to -55	-52.5	2.5		-52.5					y	na
1998	Schulze et al.	Germany	Cows (Hay and concentrates)		Range: -63 to -73; 95% conf. interval range: -69.5 to -66.9	-68	5	15	-68					y	na							Samples taken from rumen fistulae
2000	Monteil et al.	Global				-62		1	-62					y	na
2001	Bilek et al.	Japan, Tsukub	Holstein cows (C3 and C4 diet)	Many mixes, mainly C3	Range -60 to- 79	-70.6	4.9	57	-70.6	-357.8	15	56	-357.8	y	na							Samples taken from chamber
2009	Klevenhusen et al.	Switzerland	C3 and C4 diet	Many mixes	Range -65.5 to -73.4	-68.35	2.29183		-68.35					y	na							In vitro (rumen simulation technique)
2010	Klevenhusen et al.	Switzerland	Holstein Friesian and Brown Swiss cows (C3 and C4 diet)	Pure C3 and mix of C3 and C4	Range -57.5 to -67.9	-64.2	5.81292	27 (3)	-64.2					y	na							Samples taken from chamber
2012	Townsend-Small et al.	USA, Texas				-57.7	7.9196	10	-71.616	-224	57	7	-224	y	n	-13.9		-71.616	2.66333			Keeling plot done by the authors of this study; only measured isotopic values was reported in the paper
2015	Townsend et al.	USA, Texas				-56.3		7	-56.3	-283		7	-283	y	y			-56.3		-283		Samples taken from cattle feedlots
2015	AGL Energy Limited (cited in Lu et al., 2021)	New South Wales, Australia	Cattle: NSW			-51			-51					y	na
2015	Day et al. (cited in Lu et al., 2021)	Queensland, Australia	Cattle: Queensland			-49			-49	-341			-341	y	na
2016	Ginty (cited in Lu et al., 2021)	New South Wales, Australia	Cattle: NSW			-70.6			-70.6					y	na
2017	Brownlow et al.	Tai O, Hong Kong	Cows (C3 diet)			-59.0799	8.86437	12	-70.274					y	n	-8.70085		-70.274				2–3 m away from the head of the animal; Keeling plot done by the authors of this study; only measured isotopic values was reported in the paper
2017	Brownlow et al.	Pui O, Hong Kong	Water Buffalo (C3 diet)		Too close to ambient	-48.3638	1.82577	5	-63.1872					y	n			-63.1872				2–3 m away from the head of the animal; Keeling plot done by the authors of this study; only measured isotopic values was reported in the paper
2017	Brownlow et al.	Zimbabwe	Lobels Cows (C4 diet)		Too close to ambient	-48.785	2.10454	9	-52.3113					y	n			-52.3113				2–3 m away from the head of the animal; Keeling plot done by the authors of this study; only measured isotopic values was reported in the paper
2017	Brownlow et al.	Zimbabwe	Tavistock Cows (C4 diet)		Too close to ambient	-50.1269	3.19645	9	-56.7974					y	n			-56.7974				2–3 m away from the head of the animal; Keeling plot done by the authors of this study; only measured isotopic values was reported in the paper
2017	Brownlow et al.	Zimbabwe	Dom Cows (C3 and C4 diet)		Too close to ambient	-49.3572	2.82437	11	-56.6471					y	n			-56.6471				2–3 m away from the head of the animal; Keeling plot done by the authors of this study; only measured isotopic values was reported in the paper
2017	Lopez et al.	Canada	Beef catle (probably C3)		Range -64.2 to -69.1	-66.7	2.4	2	-66.7					y	n							Beef cattle feedlots
2018	Assan et al.	France				-62	3	1	-62					y	n							Isotopic fingerprint, air transported from a farm
2019	Hoheisel et al.	Germany	Dairy cows	36 % C3 : 64 % C4	Range -61.6 to -66.0	-63.9	0.9	3	-63.9					y	y			-63.9	0.9			Isotopic fingerprint
2020	Cozens et al. (cited in Nisbet et al., 2022)	Kenya	Mixed fodder (C3 and C4)			-57			-57					y	y
2020	Lowery et al.	UK - Fylde region	Dairy farms		Range -58.4 to -66.2	-61	2		-61					y	y			-61	2			Isotopic fingerprint - signatures identified from Keeling plot analysis
2020	Lowery et al.	UK - Ryedale	Dairy farms		Range -59.3 to -67.3	-65	2		-65					y	y			-65	2
2021	Al-Shalan et al.	Kuwait	Cattle farm (mix of C3 and C4)			-62.4	0.4	8	-62.4					y	y			-62.4	0.4			Isotopic fingerprint - Keeling plot intercept
2021	Lu et al.	Queensland, Australia	Cattle feedlot (mix of C4 and C3)			-62.9	1.3		-62.9	-310.5	4.6		-310.5	y	n							Available Miller-Tans plots
2021	Lu et al.	Queensland, Australia	Grazing (pasture) cattle (mix of C4 and C3)			-59.7	1		-59.7	-290.5	3.1		-290.5	y	n							Available Miller-Tans plots
2022	Menoud et al.	Europe data 2021			Range -56.8 to -73.9	-63	3.87	30	-63	-310	25.6	11	-310	y	n							No info on CH4 conc
2008	Fischer et al.	Global	Ruminants			-59				-300				y	n
2012	Melton et al.	Global	Ruminants			-60.5				-330				y	n
2016	Schwietzke et al.	Global	Ruminants			-66.8	2.8							y	n
2017	Sherwood et al.	Global	Ruminants			-65.4	6.7			-316	29			y	n
2020	Fujita et al.	Global	Ruminants			-65.4				-316				y	n

## Sheet: Wetlands
Published_date	Reference	Region	Type	δ13C_range (‰)	δ13C (‰)	SD_δ13C	n_δ13C	δ13C_final (‰)	δ2H_range (‰)	δ2H (‰)	SD_δ2H	n_δ2H	δ2H_final (‰)	Latitude	Article	Keeling_plot	Keeling_plot_Δ13Cb (‰)	Keeling_plot_Δ2Hb (‰)	Keeling_plot_δ13C (‰)	Keeling_plot_SD_δ13C	Keeling_plot_δ2H (‰)	Keeling_plot_SD_δ2H	Comment
1960	Oona and Deevey (cited in Stevens and Engelkemier, 1988)		Lakes		-69			-69							y	n							Bottom mud gases of five New England lakes
1967	Ovsyannikov and Lebedev (cited in Stevens and Engelkemier, 1988)	USSR	Marsh		-64			-64						Boreal	y	n							Marsh gases, USSR
1975	Voytov et al. (cited in Lansdown et al., 1992)	Soviet Tundra	Tundra	Range -50 to -62	-56			-56							y	n
1980	From the summary by Deine (cited in Stevens and Engelkemier, 1988)		Marine sediments	Range -55 to -85	-70	15		-70							y	n							Marine sediments
1986	Tyler (cited in Stevens and Engelkemier, 1988) (cited in Lansdown et al., 1992)	Colorado marsh/pond	Marshes and ponds	Range -48 to -55	-51.5	3.5		-51.5							y	n							Marshes and ponds, Colorado
1986	Burke and Sackett (cited in Lansdown et al., 1992)	Florida estuary	Estuary	Range -63 to -71	-66			-66						Tropical	y	n
1986	Burke and Sackett (cited in Lansdown et al., 1992)	S.E. USA lakes	Lakes	Range -52 to -75	-60			-60						Tropical	y	n
1986	Whiticar et al. (cited in Lansdown et al., 1992)	Freshwater lakes	Lakes	Range -52 to -80	-59			-59							y	n
1987	Tyler et al. (cited in Stevens and Engelkemier, 1988)		River		-64			-64							y	n							Amazon River
1987	Tyler et al. (cited in Lansdown et al., 1992) (cited in Brownlow et al., 2017)	Amazon	Floodplain		-63.7	6		-63.7						Tropical	y	n							Floodplain: Amazon. Flask samples at ground Level
1988	Tyler et al. (cited in Brownlow et al., 2017)	Nyahururu, Kenya	Swamps		-61.7	0.5		-61.7						Tropical	y	n							Swamps: Nyahururu, Kenya. Stainless steel ring-bag enclosure
1988	Tyler et al. (cited in Lansdown et al., 1992)	Papyrus swamp, Kenya	Swamp	Range -31 to -62	-52			-52						Tropical	y	n
1988	Tyler et al. (cited in Lansdown et al., 1992)	Baringo Lk, Keny	Lakes	Range -45 to -50	-48			-48						Tropical	y	n
1988	Tyler et al. (cited in Lansdown et al., 1992)	Molio River, Kenya	River	Range -54 to -55	-54			-54						Tropical	y	n
1988	Tyler et al.	Kenya	Wetland	Range -44.5 to -62.2	-53.7	6.38227	7	-53.7						Tropical	y	n							Presence of papyrus, 1m and 2m water depth; Keeling plot done by the authors of this study; only measured isotopic values was reported in the paper
1988	Quay et al. (cited in Lansdown et al., 1992) (cited in Brownlow et al., 2017)	Amazon	Floodplain	Range -41 to -73	-53	8		-53						Tropical	y	n							Floodplain: Amazon. Inverted funnel and flux chamber
1988	Quay et al. (cited in Lansdown et al., 1992)	Minnesota peat bog	Peat bog	Range -50 to -86	-66			-66							y	n
1988	Quay et al. (cited in Lansdown et al., 1992) (cited in Fisher et al., 2011)	Alaska, USA	Tundra	Range -55 to -73	-64	9		-64						Boreal	y	n							Tundra, Alaska
1988	Chanton et al. (cited in Lansdown et al., 1992)	Florida Everglades	Everglades	Range -63 to -70	-65			-65						Tropical	y	n
1988	Chanton and Martens (cited in Lansdown et al., 1992)	N. Carolina estuary	Estuary	Range -63 to -77	-70			-70							y	n
1988	Chanton et al. (cited in Brownlow et al., 2017)	Florida Everglades, USA	Mangroves		-70.1	1.8		-70.1						Tropical	y	n							Mangroves: Florida Everglades. Glass dome or plexiglas Pyramid
1988b	Burke et al. (cited in Lansdown et al., 1992)	Florida Everglades	Everglades	Range -57 to -68	-62			-62						Tropical	y	n
1988	Stevens and Engelkemier	USA	Lake		-67	5		-67							y	n							Peat bogs of the Lake Agassiz region of northern Minnesota
1988	Stevens and Engelkemier	USA	Swamps		-55	3		-55							y	n							Swamps of the Florida Everglade
1988	Stevens and Engelkemier	USA	Slough		-50.4			-50.4							y	n							Marsh gas for a slough in Northern Illinois, Released at surface
1988	Stevens and Engelkemier	USA	Slough		-56.1			-56.1							y	n							Marsh gas for a slough in Northern Illinois, Bottom gas
1988	Stevens and Engelkemeir (cited in Lansdown et al., 1992) (cited in Brownlow et al., 2017)	Florida, USA	Everglades		-55	3		-55						Tropical	y	n							Everglades: Florida. Flask surface air samples
1988	Stevens and Enqelkemeir (cited in Lansdown et al., 1992)	Minnesota peat bog	Peat bog	Range -64 to -71	-67			-67							y	n
1988	Stevens and Enqelkemeir (cited in Lansdown et al., 1992)	Illinois slough	Slough	Range -49 to -51	-50			-50							y	n
1989	Tyler	Panama	multiple sources		-61.9	3.2		-61.9						Tropical	y	n
1989	Wahlen et al. (cited in Lansdown et al., 1992)	Canadian Tundra	Tundra		-63			-63							y	n
1989	Wahlen et al.	USA	Wetland		-58.3	2.4	8	-58.3							y	n							Wetland (New York)
1989	Wahlen et al.	Canada	Tundra		-62.9	1.9	8	-62.9							y	n							Tundra (Manitoba, Canada)
1989	Wahlen et al. (cited in Lansdown et al., 1992)	W. Virginia peat bog	Peat bog		-56			-56							y	n
1989	Wahlen et al. (cited in Lansdown et al., 1992)	New York wetland	Wetland		-58			-58							y	n
1989b	Chanton et al. (cited in Lansdown et al., 1992)	Yukon R. delta	delta	Range -46 to -61	-53			-53							y	n
1989b	Chanton et al. (cited in Lansdown et al., 1992)	Virginia wetland	Wetland	Range -48 to -56	-54			-54							y	n
1989b	Chanton et al. (cited in Lansdown et al., 1992)	Amazon floodplain	Floodplain	Range -36 to -58	-45			-45						Tropical	y	n
1989	Gelwicks (cited in Lansdown et al., 1992)	Michigan lakes	Lakes	Range -56 to -83	-69			-69							y	n
1992	Martens et al.	Yukon-Kuskokwim Delta, Alaska	Wet meadow tundra		-65.82	2.21	18	-65.82						Boreal	y	n
1992	Martens et al. (also cited in Umezawa et al., 2011)	Yukon-Kuskokwim Delta, Alaska			-61.41	2.46	38	-61.41		-341.8	18.2	21	-342	Boreal	y	n
1992	Devol et al. (cited in Lansdown et al., 1992)	Amazon floodplain	Floodplain	Range -42 to -75	-58			-58						Tropical	y	n
1992	Lansdown et al.	Washington	Peat bog	Range -66 to -82	-74			-74		-308	35		-308		y	n
1993	Levin et al.	Heidelberg region, Germany	Natural Swamp		-57.4	2.1	7	-57.4		-310	9	7	-310		y	n							Natural Swamp; A metal chamber (height 30 cm) covering a surface of 0.25 m2
1993	Levin et al.	Germany	Artificial Swamp		-58.5	6.8	14	-58.5		-315	15	14	-315		y	n							Artificial Swamp (not oxidized); A metal chamber (height 30 cm) covering a surface of 0.25 m2
1993	Levin et al.	Germany	Artificial Swamp		-50.8	3.4	5	-50.8		-276	23	5	-276		y	n							Artificial Swamp (oxidized); A metal chamber (height 30 cm) covering a surface of 0.25 m2
1993	Happell et al.	Florida, USA	Everglade flooded marsh (oxidation)		-57.3	3.6		-57.3						Tropical	y	n
1993	Happell et al.	Florida, USA	Everglade flooded marsh (no oxidation)		-63.1	2.6		-63.1						Tropical	y	n
1994	Happell et al. (cited in Brownlow et al., 2017)	North Florida, USA	Swamp		-52.7	6.1		-52.7						Tropical	y	n							Swamp: North Florida. Chamber
1997	Hornibrook et al.	Ontario, Canada	2 wetlands	Range -38.1 to -72.3	-59.925	6.76233	48	-59.925	Range -183 to -348	-299.286	35.2725	35	-299.286		y	n							Porewater samples; Keeling plot done by the authors of this study; only measured δ13C was reported in the paper
1998	Kuhlmann et al. (cited in Fisher et al., 2011)	Hudson Bay, Lowlands, Canada	Wetland		-60	3		-60						Boreal	y	n							Wetland, Hudson Bay, Lowlands, Canada
2002	Nakagawa et al.	Southern Thailand	Bang Nara river		-68.3	3.1		-68.3		-288	25		-288	Tropical	y	n							Gas samples.
2002	Nakagawa et al.	Southern Thailand	Swamp		-64	4.5		-64		-323	14		-323	Tropical	y	n							Gas samples. Bubbles.
2002	Nakagawa et al.	Southern Thailand	Swamp		-67.6	7.4		-67.6		-343	2		-343	Tropical	y	n							Gas samples. Bubbles.
2002	Nakagawa et al. (cited in Brownlow et al., 2017)	Southern Thailand	Swamps		-66.1	5.1		-66.1						Tropical	y	n							Swamps: Southern Thailand. Inverted Funnel
2005	Nisbet (cited in Fisher et al., 2011)	Siberia	Wetland		-67	2		-67							y	n							Wetland, Siberia
2006	Walter et al. (cited in Fisher et al., 2011)	N. Siberia	Lakes	Range -58 to -83	-70.5	12.5		-70.5						Boreal	y	n							Ebullition from thermokarst lakes, N. Siberia
2008	Walter et al., 2008 (cited in Fisher et al., 2017)	Northern Siberian lakes	Boreal wetlands (C3)		-71			-71						Boreal
2011	Umezawa et al.	Alaska, USA			-63.4	3		-63.4		-424	79		-424	Boreal	y	y
2011	Fisher et al.	Wetland, N. Finland. S. Sriskantharajah	Wetland	Range -64.9 to -68.5	-66.5667	1.81475		-66.5667						Boreal	y	n							Wetland, N. Finland. S. Sriskantharajah unpublished data
2012	Umezawa et al., 2012 (cited in Fisher et al., 2017)	Western Siberia	Boreal wetlands (C3)		-70			-70						Boreal
2015	Maher et al. (cited in Lu et al., 2021)	New South Wales, Australia	Estuary: NSW	Range -59.9 to -63.8	-61.85	1.95		-61.85						Boreal	y	y
2015	Day et al. (cited in Lu et al., 2021)	New South Wales, Australia	Freshwater swamp: NSW		-51.2			-51.2		-258.6			-258.6	Boreal	y	y
2017	Fisher et al., 2017	Sodankylä	Boreal wetlands (C3)		-72			-72						Boreal	y	y
2017	Fisher et al., 2017	Lompolojänkkä	Boreal wetlands (C3)		-70.2			-70.2						Boreal	y	y
2017	Fisher et al., 2017	Kaamanen	Boreal wetlands (C3)		-71.2			-71.2						Boreal	y	y
2017	Fisher et al., 2017	Faerdesmyra	Boreal wetlands (C3)		-72			-72						Boreal	y	y
2017	Fisher et al., 2017	Stordalen	Boreal wetlands (C3)		-69.2			-69.2						Boreal	y	y
2017	Fisher et al., 2017	Diel studies	Boreal wetlands (C3)		-70.9	1.2		-70.9						Boreal	y	y
2017	Fisher et al., 2017	Aircraft studies	Boreal wetlands (C3)		-70.5	2.7		-70.5						Boreal	y	y
2017	Brownlow et al.	Pui O, Hong Kong	Marsh (C3 and C4)	Too close to ambient	-48.785	0.980864	7	-50.8135						Tropical	y	y, combined	-8.0304		-50.8135				Heights between 5 cm and 3 m above the source; Keeling plot done by the authors of this study; only measured isotopic values was reported in the paper
2017	Brownlow et al.	Yi O, Hong Kong	Marsh (C3 and C4)	Too close to ambient	-47.7862	1.17354	12	-59.4516						Tropical	y	y			-59.4516				Heights between 5 cm and 3 m above the source; Keeling plot done by the authors of this study; only measured isotopic values was reported in the paper
2017	Brownlow et al.	Mai Po, Hong Kong	Reed (C4), mangroves (C3), and marshes	Too close to ambient	-48.0254	0.488001	9	-53.9048						Tropical	y	y			-53.9048				Heights between 5 cm and 3 m above the source; Keeling plot done by the authors of this study; only measured isotopic values was reported in the paper
2017	Brownlow et al.	Uganda	Papyrus swamp (C4)	Too close to ambient	-48.1143	1.14809	9	-52.5062						Tropical	y	y			-52.5062				Heights between 5 cm and 3 m above the source; Keeling plot done by the authors of this study; only measured isotopic values was reported in the paper
2017	Brownlow et al.	Lake Victoria, Uganda	Freshwater wetland: papyrus (mostly C4)	Too close to ambient	-47.6414	0.623491	6	-52.8676						Tropical	y	y			-52.8676				Heights between 5 cm and 3 m above the source; Keeling plot done by the authors of this study; only measured isotopic values was reported in the paper
2017	Brownlow et al.	Palo Verde National Park , Costa Rica	Coastal floodplain freshwater marsh (C3 and C4)	Too close to ambient	-47.7384	0.0853993	5	-54.0796						Tropical	y	y			-54.0796				Heights between 5 cm and 3 m above the source; Keeling plot done by the authors of this study; only measured isotopic values was reported in the paper
2017	Brownlow et al.	Sierpe Mangroves, Costa Rica	Mangroves (C3)	Too close to ambient	-47.7396	0.370557	4	-47.7396						Tropical	y	y, invalid			-43.4914				Heights between 5 cm and 3 m above the source; Keeling plot done by the authors of this study; only measured isotopic values was reported in the paper
2017	Brownlow et al.	Puerto Jimenez, Costa Rica	Mangroves (C3)	Too close to ambient	-48.61	1.8161	4	-48.61						Tropical	y	y, invalid			-11.2575				Heights between 5 cm and 3 m above the source; Keeling plot done by the authors of this study; only measured isotopic values was reported in the paper
2017	Brownlow et al.	Lake Titicaca, Bolivia	Freshwater wetland (C3)	Too close to ambient	-47.683	0.294033	11	-58.8294						Tropical	y	y			-58.8294				Heights between 5 cm and 3 m above the source; Keeling plot done by the authors of this study; only measured isotopic values was reported in the paper
2017	Brownlow et al.	Danum Valley, Borneo	Forest wetland (C3)	Too close to ambient	-47.4972	0.370915	11	-59.7662						Tropical	y	y			-59.7662				Heights between 5 cm and 3 m above the source; Keeling plot done by the authors of this study; only measured isotopic values was reported in the paper
2017	Brownlow et al.	Tor Doone, South Africa	Freshwater wetland (C3)	Too close to ambient	-48.0807	1.84124	11	-61.4063						Tropical	y	y			-61.4063				Heights between 5 cm and 3 m above the source; Keeling plot done by the authors of this study; only measured isotopic values was reported in the paper
2018	Rosentreter et al. (cited in Lu et al., 2021)	Australia	Estuary: Queensland	Range -37.5 to -70.0	-53.75	16.25		-53.75						Tropical	y	y
2021	Lu et al.	Queensland, Australia	River seep		-61.5	1.4		-61.5		-225.1	2.9		-225.1	Tropical	y	y
2021	France J et al. (cited in Nisbet et al., 2022)	Bolivia	Wetland flights		-58.7	1.9		-58.7						Tropical	y	y							Wetland flights
2022	Shaw JT et al. (cited in Nisbet et al., 2022)	Zambia	Wetland		-59.8	1		-59.8						Tropical	y	y							Wetland
2022	Nisbet et al.	Central Uganda Kyoga region	C4 and C3 mixed wetlands and farming		-54.5	1.4		-54.5						Tropical	y	y
2022	Nisbet et al.	Central Uganda Wamala region	C4 and C3 mixed wetlands and farming		-49.3	0.9		-49.3						Tropical	y	y
2022	France et al., 2022	Bolivia	Seasonal wetland		-55.8	1.3		-55.8						Tropical	y	y
2022	France et al., 2022	Hong Kong	Reeded wetlands		-62.7	2.1		-62.7						Tropical	y	y
2022	France et al., 2022	Uganda	Lake edge wetland		-54.2	0.9		-54.2						Tropical	y	y
2022	France et al., 2022	Zambia	Riverine reeded wetland		-59.6	2		-59.6						Tropical	y	y
2022	France et al., 2022	Zimbabwe	Wetland plains		-57.3	1.8		-57.3						Tropical	y	y
2022	France et al., 2022	Botswana	Seasonal wetland		-56.3	1.1		-56.3						Tropical	y	y
2022	France et al., 2022	Botswana	Seasonal wetland		-31.4	5.1		-31.4						Tropical	y	y
2008	Fischer et al.	Global	Boreal wetlands		-64					-327					y	n
2008	Fischer et al.	Global	Tropical wetlands		-58					-320					y	n
2012	Melton et al.	Global	Boreal wetlands		-64.5					-360					y	n
2012	Melton et al.	Global	Thermokarst lakes		-70					-380					y	n
2012	Melton et al.	Global	Tropical wetlands		-58.9					-315					y	n
2012	Melton et al.	Global	APM (aerobic plant methane)		-61					-348					y	n
2017	Bock et al.	Global	Microbial south		-61.4	1				-312.8	20				y	n
2017	Bock et al.	Global	Microbial north		-62.6	1				-323.1	20				y	n
2017	Sherwood et al.	Global	Wetlands		-61.5	5.4				-310	42				y	n
2020	Fujita et al.	Global	Boreal wetlands		-70					-360					y	n
2020	Fujita et al.	Global	Tropical wetlands		-55					-320					y	n

## Sheet: Rice Paddies
Published_date	Reference	Region	Type	δ13C_range (‰)	δ13C (‰)	SD_δ13C	n_δ13C	δ13C_final (‰)	δ2H (‰)	SD_δ2H	n_δ2H	δ2H_final (‰)	Latitude	Article	Keeling_plot	Keeling_plot_Δ13Cb (‰)	Keeling_plot_Δ2Hb (‰)	Keeling_plot_δ13C (‰)	Keeling_plot_SD_δ13C	Keeling_plot_δ2H (‰)	Keeling_plot_SD_δ2H	Comment
1988	Stevens and Engelkemier	USA	Excess CH4 Above Background	Range -66.1 to -68.2	-67.175	0.917878	4	-67.175						y	n							Rice paddies, Sacramento, California
1988	Tyler et al. (cited in Brownlow et al., 2017)	Kenya		Range -50.5 to -63.4	-58.0583	3.71127	12	-58.0583					Tropical	y	n							Rice paddy: Kenya. Stainless steel ring-bag enclosure
1989	Wahlen et al.	USA			-63.2	2.9	8	-63.2					Tropical	y	n							Rice (Louisiana)
1989	Wahlen et al.	USA			-56.7	3.3	8	-56.7					Tropical	y	n							Peat bog (West Virginia)
1991	Uzaki et al.	Japan		Range -47.5 to -68.3	-56.4977	4.36084	43	-56.4977					Temperate	y	n							Rice paddies: sampling water and from it, gas was extracted
1993	Levin et al.	Vercelli, Italy			-65.4	1.6	7	-65.4	-332	9	7	-332	Temperate	y	n							A metal chamber (height 30 cm) covering a surface of 0.25 m2
1993	Wahlen et al.				-63	1	3	-63	-300	5	3	-300		y	n
1994	Tyler et al. (cited in Brownlow et al., 2017)	Japan		Range -56.3 to -71.7	-64.3667	4.66479	30	-64.3667					Temperate	y	n							Rice paddies: Japan. Chamber
1997	Chanton et al.	Louisiana, USA	Texmont		-60.2	0.6	4	-60.2	-312	11		-312	Tropical	y	n							Rice paddies: Lusiana. Chamber. Sedimentary bubbles.
1997	Chanton et al.	Louisiana, USA	Textmont		-65.5	0.4		-65.5					Tropical	y	n							Rice paddies: Lusiana. Chamber. Emitted CH4.
1997	Chanton et al.	Louisiana, USA	Lemont		-57.9	0.2	3	-57.9	-313	12		-313	Tropical	y	n							Rice paddies: Lusiana. Chamber. Sedimentary bubbles.
1997	Chanton et al.	Louisiana, USA	Lemont		-63.5	2		-63.5					Tropical	y	n							Rice paddies: Lusiana. Chamber. Emitted CH4.
1997	Chanton et al.	Louisiana, USA	Floodwater		-44	2.2		-44					Tropical	y	n							Rice paddies: Lusiana. Chamber. Floodwater.
1997	Bergamaschi, P.	Suzhou, Jiangsu Province, China	Emitted CH4	Range -51.6 to -70.8	-63.8	4.9	28	-63.8	-335.7	10.1	19	-335.7	Temperate	y	n							Rice paddies: China. Chamber. Emitted CH4.
1997	Bergamaschi, P.	Suzhou, Jiangsu Province, China	Gas bubbles		-64.1	3	13	-64.1	-349.2	4.7	12	-349.2	Temperate	y	n							Rice paddies: China. Chamber. Bubbles-
2002	Nakagawa et al. (cited in Brownlow et al., 2017)	Southern Thailand			-56.5	4.6	49	-56.5					Tropical	y	n							Rice paddies: peat soils Southern Thailand. Gas bubbles trapped in inverted funnel
2002	Nakagawa et al. (cited in Brownlow et al., 2017)	Southern Thailand			-51.5	7.1	47	-51.5					Tropical	y	n							Rice paddies: mineral soils Southern Thailand. Gas bubbles trapped in inverted funnel
2008	Rao et al. (cited in Brownlow et al., 2017)	India		Range -54.3 to -57.2	-55.75	1.45		-55.75					Tropical	y	n							Rice paddies: India. Chamber
2017	Brownlow et al.	Yi O, Hong Kong	Rice wetland (C3)	Too close to ambient	-48.8219	1.79023	16	-58.4512					Tropical	y	y, combined	-9.55293		-58.4512				Heights between 5 cm and 3 m above the source; Keeling plot done by the authors of this study; only measured isotopic values was reported in the paper
2017	Brownlow et al.	Hok Tau, Hong Kong	Rice wetland (C3)	Too close to ambient	-49.263	2.07229	11	-58.7396					Tropical	y	y			-58.7396				Heights between 5 cm and 3 m above the source; Keeling plot done by the authors of this study; only measured isotopic values was reported in the paper
2022	France et al.	Hong Kong			-57.9	1		-57.9					Tropical	y	y
2022	France et al.	Vietnam			-62.4	3		-62.4					Tropical	y	y
2008	Fischer et al.	Global	Rice paddies		-63				-320					y	n
2017	Sherwood et al.	Global	Rice paddies		-62.5	3.9			-323	16				y	n
2020	Fujita et al.	Global	Rice paddies		-62.2				-323					y	n

## Sheet: Landfills&Wastewater
Published_date	Reference	Region	Type	δ13C_range (‰)	δ13C (‰)	SD_δ13C	n_δ13C	δ13C_final (‰)	δ2H_range (‰)	δ2H (‰)	SD_δ2H	n_δ2H	δ2H_final (‰)	Waste_type	Article	Keeling_plot	Keeling_plot_Δ13Cb (‰)	Keeling_plot_Δ2Hb (‰)	Keeling_plot_δ13C (‰)	Keeling_plot_SD_δ13C	Keeling_plot_δ2H (‰)	Keeling_plot_SD_δ2H	Comment
1976	Garnes and Hayes (cited in Stevens and Engelkemier, 1988)		Organic waste	Range -49 to -52	-51.5	1.5		-51.5							y	n
1986	Tyler (cited in Bergamaschi et al. 1998)	Denver, Colorado, USA	Soil air (depth >30 cm)		-52.7	2.2	2	-52.7							y	n
1990	Hitchman et al. (cited in Bakkaloglu et al., 2022)	UK	Landfill	Range -54 to -64	-59	5		-59	Range -233 to -308	-270.5	37.5		-270.5	Landfill	y
1990	Hitchman et al. (cited in Bakkaloglu et al., 2022)	UK	Sewage		-51.6			-51.6		-265			-265	Wastewater	y
1990	Hitchman et al. (cited in Bakkaloglu et al., 2022)	UK	Anaerobic digester	Range -48.4 to -74.4	-61.4	13		-61.4	Range -286 to -342	-305	19		-305	Wastewater	y
1993	Levin et al.	Germany	Liquid Manure		-73.9	0.7	3	-73.9		-298	21	2	-298		y	n							a stainless steel tube to different depths into the ground
1993	Levin et al.	Germany	Manure Pile, lower layers		-45.5	1.3	3	-45.5		-297	6	3	-297		y	n							a stainless steel tube to different depths into the ground
1993	Levin et al.	Germany	Manure Pile, upper layers		-58.3	14	2	-58.3		-301	7	2	-301		y	n							a stainless steel tube to different depths into the ground
1993	Levin et al.	Germany	Biogas Generator		-51.8	2.8	4	-51.8		-305	12	4	-305		y	n							a stainless steel tube to different depths into the ground
1993	Levin et al.	Germany	Landfill, lower layers		-62.9	4.6	9	-62.9		-312	8	8	-312	Landfill	y	n							a stainless steel tube to different depths into the ground
1993	Levin et al.	Germany	Landfill, upper layers		-52		1	-52						Landfill	y								a stainless steel tube to different depths into the ground
1993	Wahlen (cited in Bergamaschi et al. 1998)			Range -51 to -49	-50	0.5	3	-50	Range -300 to -280	-290	5	3	-290			n
1993	Bergamaschi et al. (cited in Bergamaschi et al. 1998)	Germany	Soil air	Range -72 to -16	-44	28	10	-44	Range -331 to -207			9				n							Ph.-D thesis Uni Heidelberg
1995	Bergamaschi and Harris et al. (cited in Bergamaschi et al. 1998)	Germany	Gas collection system	Range -55.3 to -62.3	-60.3	1.6	23	-60.3	Range -327 to -287	-302	12	23	-302		y	n
1996	Chanton et al. (cited in Bergamaschi et al. 1998)		Anoxic zone		-55.8	1.7	52	-55.8		-290	7	42	-290
1996	Chanton et al. (cited in Bergamaschi et al. 1998)		Static chambers	Range -56 to -41	-48.5	7.5		-48.5	Range -298 to -258							n
1998	Liptay et al. (cited in Bakkaloglu et al., 2022)	New England, US	Landfill	Range -48.1 to -50.4	-49.25	1.15		-49.25	Range -273 to -281	-277	4		-277	Landfill	y
1998	Bergamaschi et al.	Germany, Netherlands	Gas collection system		-59	2.2	104	-59		-304	10	46	-304		y	n
1998	Bergamaschi et al.	Germany, Netherlands	Soil air	Range -72 to -16	-44	28	108	-44	Range -348 to -207			83			y	n
1998	Bergamaschi et al.	Germany, Netherlands	Static chambers	Range -64 to -31	-47.5	16.5	67	-47.5	Range -336 to -169			43			y	n
1998	Bergamaschi et al.	Germany, Netherlands	Atmospheric measurements		-55.4	1.4		-55.4							y	n
1999	Levin et al. (cited in Bakkaloglu et al., 2022)	Germany	Waste		-55.4	1.4		-55.4							y
1999	Quay et al. (cited in Bakkaloglu et al., 2022)	Different locations, USA	Landfill		-50	2		-50		-310	10		-310	Landfill	y
2000	Chanton and Liptay	Florida, USA	Anoxic zone	Range -54 to -56	-55.18	0.15		-55.18							y	n							Ventilation pipes
2000	Chanton and Liptay	Florida, USA	Chmabers	Range -40 to -54	-47	17		-47							y	n
2001	Lowry et al.	UK	Atmospheric measurements		-52.5		10	-52.5							y	y			-52.5				Diurnal campaign
2001	Lowry et al. (cited in Bakkaloglu et al., 2022)	UK	Landfill	Range -50.8 to -52.6	-51.7	0.9		-51.7						Landfill	y
2007	Borjesson et al. (cited in Bakkaloglu et al., 2022)	Sweden	Active landfill	Range -52.9 to -58.1	-55.5	2.6		-55.5						Landfill	y
2007	Borjesson et al. (cited in Bakkaloglu et al., 2022)	Sweden	Closed landfill	Range -50.3 to -52.2	-51.25	0.95		-51.25						Landfill	y
2011	Monteil et al. (cited in Bakkaloglu et al., 2022)	Global	Landfills/waste		-55			-55						Landfill	y
2011	Toyoda et al. (cited in Bakkaloglu et al., 2022)	Japan	Sewage treatment	Range -45.5 to -51.7	-48.6	3.1		-48.6						Wastewater	y
2012	Townsend-Small et al. (cited in Bakkaloglu et al., 2022)	Los Angeles, US	Sewage treatment	Range -46.3 to -47	-46.65	0.35		-46.65		-298			-298	Wastewater	y
2012	Townsend-Small et al. (cited in Bakkaloglu et al., 2022)	Los Angeles, US	Landfill gas collection	Range -61.5 to -61.9	-61.7	0.2		-61.7	Range -313.9 to -316.1	-315	1.1		-315	Landfill	y
2012	Townsend-Small et al. (cited in Bakkaloglu et al., 2022)	Riverside County, US	Manure digestor test facility	Range -50.2 to -52.4	-51.3	1.1		-51.3	Range -280 to -333.6	-306.8	26.8		-306.8		y
2013	Phillips et al. (cited in Bakkaloglu et al., 2022)	Boston, US	Biogenic sources	Range -53.1 to -64.5	-58.8	5.7		-58.8							y
2015	Polag et al. (cited in Bakkaloglu et al., 2022)	Germany	Anaerobic digester	Range -40 to -60	-50	10		-50						Wastewater	y
2015	Day et al. (cited in Lu et al., 2021)	New South Wales, Australia	Anaerobic digester		-49.7			-49.7		-326.2			-326.2	Wastewater	y
2015	Day et al. (cited in Lu et al., 2021)	New South Wales, Australia	Landfill: NSW		-53			-53		-255.2			-255.2	Landfill	y
2015	AGL Energy Limited (cited in Lu et al., 2021)	New South Wales, Australia	Landfill: NSW		-44			-44						Landfill	y
2015	Townsend-Small et al.	Texas, USA	Atmospheric measurements	Range -47.2 to -56.1	-51.3	3.3	8	-54.8	Range -147 to -269	-205	44	8	-260		y	y			-54.8		-260
2015	Zazzeri et al.	UK	Atmospheric measurements	Range -55.2 to -60.2	-58	3	104	-58							y	n							Keeling plot available just for 2 landfills, they sampled more landfills
2016	Townsend-Small et al. (cited in Bakkaloglu et al., 2022)	Colorado, USA	Active landfill		-58.1	1.4		-58.1		-290	4		-290	Landfill	y
2017	Lopez et al. (cited in Bakkaloglu et al., 2022)	Canada	Landfill		-55.3	0.2		-55.3						Landfill	y
2017	Sherwood et al. (cited in Bakkaloglu et al., 2022)	Global	Waste	Range -45.5 to -73.9	-59.7	14.2		-59.7	Range -281 to -312	-296.5	15.5		-296.5		y
2017	Assan et al.	France		Range -43 to -57	-60	1.3	8	-60							y	n							Using Miller-Tans plot
2018	Obersky et al. (cited in Lu et al., 2021)	Queensland, Australia	Landfill: Queensland	Range -49.7 to -67.4	-58.55	8.85		-58.55		-279			-279	Landfill	y
2019	Yang et al. (cited in Bakkaloglu et al., 2022)	Houston, US	McCarty landfill	Range -54.4 to -61.8	-58.1	3.7		-58.1						Landfill	y
2019	Yang et al. (cited in Bakkaloglu et al., 2022)	Houston, US	Greenbelt landfill	Range -56.8 to -60.5	-58.65	1.85		-58.65						Landfill	y
2019	Yang et al. (cited in Bakkaloglu et al., 2022)	Houston, US	Houston solid waste management	Range -46.9 to -53.0	-49.95	3.05		-49.95							y
2019	Hoheisel et al. (cited in Bakkaloglu et al., 2022)	Germany	Landfill	Range -54.2 to -62.2	-58.2	4		-58.2						Landfill	y
2019	Hoheisel et al. (cited in Bakkaloglu et al., 2022)	Germany	Biogas	Range -59.0 to -64.2	-61.6	2.6		-61.6							y
2019	Hoheisel et al. (cited in Bakkaloglu et al., 2022)	Germany	Sewage treatment		-51.3	0.2		-51.3						Wastewater	y
2020	Xueref-Remy et al. (cited in Bakkaloglu et al., 2022)	France	Sewage treatment	Range -51.0 to -55.3	-53.15	2.15		-53.15						Wastewater	y
2020	Xueref-Remy et al. (cited in Bakkaloglu et al., 2022)	France	Landfill	Range -53.0 to -65.9	-59.45	6.45		-59.45						Landfill	y
2020	Lowry et al. (cited in Bakkaloglu et al., 2022)	UK	Active landfills	Range -56 to -61	-58.5	2.5		-58.5						Landfill	y
2020	Lowry et al. (cited in Bakkaloglu et al., 2022)	UK	Closed landfills	Range -53 to -58	-55.5	2.5		-55.5						Landfill	y
2021	Lu et al.	Queensland, Australia	Wastewater treatment plant		-47.6	0.2		-47.6		-177.3	2.3		-177.3	Wastewater	y
2021	Lu et al.	Queensland, Australia	Piggery		-47.6	0.2		-47.6		-300.1	2.6		-300.1		y	n							Available Miller-Tans plots
2021	Lu et al.	Queensland, Australia	Export abattoir		-44.5	0.2		-44.5		-314.6	1.8		-314.6		y	n							Available Miller-Tans plots
2022	Al-Shalan et al. (cited in Bakkaloglu et al., 2022)	Kuwait	Active landfill	Range -58.5 to -59.5	-59	0.5		-59						Landfill	y
2022	Al-Shalan et al. (cited in Bakkaloglu et al., 2022)	Kuwait	Closed landfill	Range -51.9 to -56.4	-54.15	2.25		-54.15						Landfill	y
2022	Al-Shalan et al. (cited in Bakkaloglu et al., 2022)	Kuwait	Sewage treatment	Range -45.1 to -59.2	-52.15	7.05		-52.15						Wastewater	y
2022	Bakkaloglu et al., 2022	UK	Biogas plants		-54.6	5.6	34	-54.6		-314.4	23	3	-314.4		y
2022	Bakkaloglu et al., 2022	UK	Landfills		-56.8	2.3	43	-56.8		-268.2	2.1	2	-268.2	Landfill	y
2022	Bakkaloglu et al., 2022	UK	Sewage treatment plants		-51.6	2.2	15	-51.6		-303.9	22	6	-303.9	Wastewater	y
2022	Bakkaloglu et al., 2022	UK	Composting facilities		-54.7	3.9	6	-54.7							y
2022	Bakkaloglu et al., 2022	UK	Landfill leachate treatment plant		-57.1	1.8	2	-57.1						Landfill	y
2022	Bakkaloglu et al., 2022	UK	Water treatment plant		-53.7	0.1		-53.7						Wastewater	y
2022	Bakkaloglu et al., 2022	UK	Waste recycling facility		-53.2	0.2		-53.2							y
2008	Fischer et al.	Global	Landfills		-50					-310					y	n
2017	Sherwood et al.	Global	Waste		-56	7.6				-298	11				y	n
2020	Fujita et al.	Global	Landfills		-56					-298					y	n

## Sheet: Termites
Published_date	Reference	Region	Type	δ13C_range (‰)	δ13C (‰)	SD_δ13C	n_δ13C	δ2H (‰)	SD_δ2H	n_δ2H	Article	Keeling_plot	Keeling_plot_Δ13Cb (‰)	Keeling_plot_Δ2Hb (‰)	Keeling_plot_δ13C (‰)	Keeling_plot_SD_δ13C	Keeling_plot_δ2H (‰)	Keeling_plot_SD_δ2H	Comment
1986	Tyler (cited in Stevens and Engelkemier, 1988)			Range -56 to -76	-66	10					y	n
1988	Tyler et al. (cited in Brownlow et al., 2017)	Kenya			-61.6	8					y	n
1998	Sugimoto et al. (cited in Lu et al., 2021)	Australia		Range -77.6 to -88.2	-82.9	5.3					y
1989	Wahlen et al.	USA			-68	0.2	1				y	n
2012	Melton et al.	Global			-65			-390			y	n
2017	Sherwood et al.	Global			-63.4	6.4		-343	33		y	n
2020	Fujita et al.	Global			-63.4			-343			y	n
